# Supplementary material
Source: PubMed Central journal article supplement (PMC3073014)
Supplement: NIHMS275874-supplement-01.pdf [file NIHMS275874-supplement-01.pdf]

**SUPPLEMENTAL FIGURES:****Figure S1. Characterization of *Map3k2*<sup>-/-</sup>*Map3k3*<sup>Lck-cre/-</sup> mice**

(A) Genotyping the *Map3k2*<sup>-/-</sup>*Map3k3*<sup>Lck-cre/-</sup> Mice. Left panels: PCR genotyping of *Map3k2*<sup>-/-</sup>*Map3k3*<sup>Lck-cre/-</sup>, *Map3k2*<sup>+/-</sup>*Map3k3*<sup>f/+</sup>, and *Map3k2*<sup>-/-</sup>*Map3k3*<sup>Lck-cre/+</sup> mice. The *Mekk3* floxed allele, *Map3k3* WT allele, *Map3k2* WT allele, flox sequence deleted ( $\Delta$ ) flox allele, and the KO allele are indicated. The presence of cre transgene was determined by Cre specific PCR (bottom panel). Right panels: Total thymocytes from a WT mouse and a *Map3k2*<sup>-/-</sup>*Map3k3*<sup>Lck-cre/-</sup> mouse were lysed and analyzed by immunoblotting for *Map3k2* and *Map3k3* expression. The ERK2 and p38 immunoblots were used as loading controls. The immunoblotting condition, PCR primers and PCR conditions were described previously (Guo et al., 2002; Wang et al., 2009).

(B) Numbers of splenic Treg and Th17 cells in the *Map3k2*<sup>-/-</sup>*Map3k3*<sup>Lck-cre/-</sup> mice. Total numbers of Foxp3<sup>+</sup>CD4<sup>+</sup> T cells (upper panel) or IL-17A<sup>+</sup> CD4<sup>+</sup> T cells (lower panel) in the spleens of WT and *Map3k2*<sup>-/-</sup>*Map3k3*<sup>Lck-cre/-</sup> mice were calculated based on the percentages of Foxp3<sup>+</sup> and IL-17A<sup>+</sup> CD4 T cells determined by flow cytometry as described in Figure 1. Data shown are the average of five pairs of mice. Error bars show standard deviation. \*, p<0.05 by two tailed Student's *t* test. N.S.: not statistically significant.

(C) *In vitro* suppressive activity of CD4<sup>+</sup>CD25<sup>+</sup> cells from the *Map3k2*<sup>-/-</sup>*Map3k3*<sup>Lck-cre/-</sup> mice. CD4<sup>+</sup>CD25<sup>+</sup> cells were purified from the pooled spleen and lymph nodes of either *Map3k2*<sup>-/-</sup>*Map3k3*<sup>Lck-cre/-</sup> mice or WT mice. WT CD4<sup>+</sup>CD25<sup>-</sup> cells were sorted, labeled with CFSE, and used as responder cells (T-responder). The responder cells were cultured either alone, at 1:1 or 4:1 ratios with flow cytometry sorted WT or *Map3k2*<sup>-/-</sup>*Map3k3*<sup>Lck-cre/-</sup> CD4<sup>+</sup>CD25<sup>+</sup> cells as indicated in the presence of 1  $\mu$ g/ml CD3 antibody and irradiated

splenocytes. Proliferation of the T-responder cells was determined 4-days later by CFSE dilution. Data shown are representative of three independent experiments.

(D) Frequency of IL-17A<sup>+</sup> and IFN- $\gamma$ <sup>+</sup> cells in the *Map3k2*<sup>-/-</sup>*Map3k3*<sup>Lck-cre/-</sup> CD4 effector T cells. Splenocytes from *Map3k2*<sup>-/-</sup>*Map3k3*<sup>Lck-cre/-</sup> or WT mice were stimulated with PMA+ionomycin in the presence of Golgistop for 4 h and the CD44<sup>hi</sup>CD4<sup>+</sup> population was gated and analyzed for IL-17A<sup>+</sup> and IFN- $\gamma$ <sup>+</sup> cells as indicated.

(E) Gene expression profiles of *Map3k2*<sup>-/-</sup>*Map3k3*<sup>Lck-cre/-</sup> effector CD4 T Cells. Effector CD4 T cells (CD4<sup>+</sup>CD62L<sup>lo</sup>CD44<sup>hi</sup>) were sorted from either WT or *Map3k2*<sup>-/-</sup>*Map3k3*<sup>Lck-cre/-</sup> mice. Upper panel: RNA were analyzed by an Illumina gene array. The full array data are shown in Table 1 and the expression of the selected Th17 and Th1 signature genes is shown by a bar graph (upper panel). Lower panel: real-time qPCR analysis of *Rorc*, *Il17A*, *Tbx21*, and *Ifn $\gamma$*  gene expression. Data shown are the summary of two independent experiments. \*\*, p<0.01 by two tailed Student's *t* test.

(F) Analysis of chimeric *Rag1*<sup>-/-</sup> mice reconstituted with bone marrow cells from WT or *Map3k2*<sup>-/-</sup>*Map3k3*<sup>Lck-cre/-</sup> mice. *Rag1*<sup>-/-</sup> mice were sub-lethally irradiated and then reconstituted with either WT or *Map3k2*<sup>-/-</sup>*Map3k3*<sup>Lck-cre/-</sup> bone marrow cells. The reconstituted mice were analyzed 8 weeks later. Spleen CD4 T cells were analyzed for CD62L and CD44 expression (left panel); frequencies of Foxp3<sup>+</sup> cells (middle panel); and frequencies of IL-17A<sup>+</sup> and IFN- $\gamma$ <sup>+</sup> cells by flow cytometry. Numbers in the graphs show the percentages of the gated populations. Data are representative of 8 pairs of mice from two independent experiments.

### **Figure S2 Loss of both *Map3k2* and *Map3k3* in naive T cells results in increased sensitivity to TGF- $\beta$ mediated T cell differentiation**

(A, B) Expression of Th17-related genes in *in vitro* differentiated *Map3k2*<sup>-/-</sup>*Map3k3*<sup>Lck-cre/-</sup> (dKO) Th17 cells. WT or dKO CD4 T cells were differentiated under Th17 condition with

5 ng/ml TGF- $\beta$  and 20 ng/ml IL-6 for 5 days. (A) Expression of ROR $\gamma$ t was determined by intracellular staining. (B) After PMA+ionomycin restimulation for 4 h, RNA were prepared for real-time RT-PCR analysis for the expression of *Rorc*, *Il-17a*, *Il-17f*, *Il-21*, *Il-22*, and *Il-21r* genes, which were normalized to the expression level of *Hprt* gene. Data shown are representative of two independent experiments. \*\*,  $p < 0.01$  by two tailed Student's *t* test. N.S.: not statistically significant.

(C) Deletion of both *Map3k2* and *Map3k3* in T cells was required for the hyper-sensitivity to TGF- $\beta$  signal *in vitro*. Naïve CD4 T cells purified from *Map3k2*<sup>-/-</sup>, *Map3k3*<sup>Lck-Cre/-</sup> or WT mice were differentiated under the Treg condition with 1 ng/ml or 5 ng/ml TGF- $\beta$  for 5 days. Percentages of Foxp3<sup>+</sup> cells were determined by flow cytometry. Numbers in the flow cytometry graphs show the percentages of the Foxp3 positive populations.

(D) Differentiation of naïve *Map3k2*<sup>-/-</sup>*Map3k3*<sup>Lck-cre/-</sup> CD4 T cells *in vitro* under Th2 condition. Naïve CD4 T cells from either *Map3k2*<sup>-/-</sup>*Map3k3*<sup>Lck-cre/-</sup> or WT mice were differentiated under Th2 condition (IL-4+anti-IFN $\gamma$ +IL-2) for 5 days before being re-stimulated with PMA+ionomycin for 4 h in the presence of Golgistop. The IL-4 and IFN $\gamma$  expressing cells were analyzed by flow cytometry. Numbers in the plots show the percentages of the gated populations. Data shown are representative of two independent experiments.

**Figure S3. The EPSM SMAD3 induced reporter activity is resistant to *Map3k3* and *Map3k2* Suppression**

Control empty vector or expression vectors for *Map3k2* or *Map3k3* were co-transfected with WT SMAD3 or EPSM SMAD3 into 293T cells together with the SMAD reporter plasmid CAGA<sub>12</sub>-Luc. Twenty-four h after transfection, the reporter activity was determined using a dual luciferase kit. Relative suppression by *Map3k2* and *Map3k3*

was calculated by  $(1 - \text{Luciferase}_{\text{MEKK}} / \text{Luciferase}_{\text{control empty vector}}) \times 100\%$ . Error bars are standard deviation of the mean. \*\*,  $p < 0.01$  by two tailed Student's *t* test. Data are representative of two independent experiments.

**Figure S4. ERK1+2 mediate TCR induced SMAD linker region phosphorylation**

(A) Naïve WT and *Map3k2*<sup>-/-</sup> *Map3k3*<sup>Lck-cre/-</sup> CD4 T cells (CD4<sup>+</sup>CD62L<sup>hi</sup>CD44<sup>lo</sup>CD25<sup>-</sup>) were sorted and either untreated (ctl) or stimulated with plate bound anti-CD3 antibody ( $\alpha$ -CD3) for 30 min. RNA were prepared for real time-qPCR analysis for the induction of *egr1* and *c-fos* gene expression. Data shown are the relative values of *egr-1* and *c-fos* gene expression after normalized to the endogenous reference (*Hprt*) using the formula  $2^{-\Delta\Delta Ct}$ . Data are representative of two independent experiments. \*\*,  $p < 0.01$  by two tailed Student's *t* test.

(B) GSK3 and CDK were not involved in the TCR Induced phosphorylation of SMAD at linker regions. WT CD4 T cells were either non-treated (Ctl), or treated with the indicated inhibitors for 1 h before being activated by an anti-CD3 antibody. The induction of ERK1+2 phosphorylation (pERK1+2) and SMAD2 linker region phosphorylation (pSMAD2<sup>S245+250+255</sup>) was determined by immunoblotting. Total ERK2 expression was shown as a loading control. ERK-i, U0126 (5  $\mu$ M); p38-i, SB20190 (5  $\mu$ M); (E+p)-i, U0126 + SB20190; CDK-i, flavopiridol (0.3  $\mu$ M), and GSK-i, SB216763 (5  $\mu$ M).

(C) WT CD4 T cells were either untreated (time 0) or stimulated with IL-2 (100 U/ml) for the indicated time periods. Phosphorylation of ERK1+2, STAT5, SMAD2 (anti-pSMAD2<sup>S245+250+255</sup>) and SMAD3 (anti-pSMAD3<sup>S204</sup>) in the linker region was determined by immunoblotting. Total ERK2 protein level was shown as a loading control. Data are representative of two independent experiments.

**Figure S5. A model illustrating the TCR dependent MEKK2+3-ERK1+2 module and the proposed mechanism by which it suppresses the TGF- $\beta$  signal during Th cell differentiation through phosphorylation of the SMAD2 and SMAD3 at their linker regions.**

**Table S1. Gene Array Analysis of *Map3k2*<sup>-/-</sup>*Map3k3*<sup>Lck-cre/-</sup> and Wild Type Effector T Cells**

CD4<sup>+</sup>CD44<sup>hi</sup>CD62L<sup>lo</sup> cells were sorted from either *Map3k2*<sup>-/-</sup>*Map3k3*<sup>Lck-cre/-</sup> mice or WT mice. RNA was extracted and analyzed using an Illumina Beads Array. After subtracting the background, fold changes were calculated, and probes with fold change less than 1.4 were discarded. Genes with positive fold change values were more highly expressed in the *Map3k2*<sup>-/-</sup>*Map3k3*<sup>Lck-cre/-</sup> cells; genes with negative fold change values were more highly expressed in WT cells.

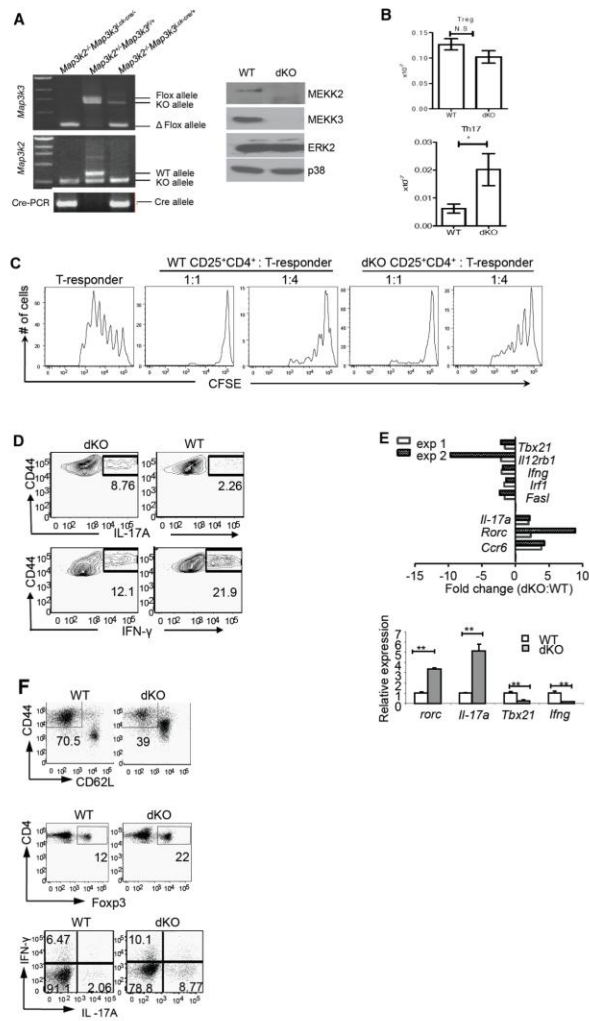

Figure S1

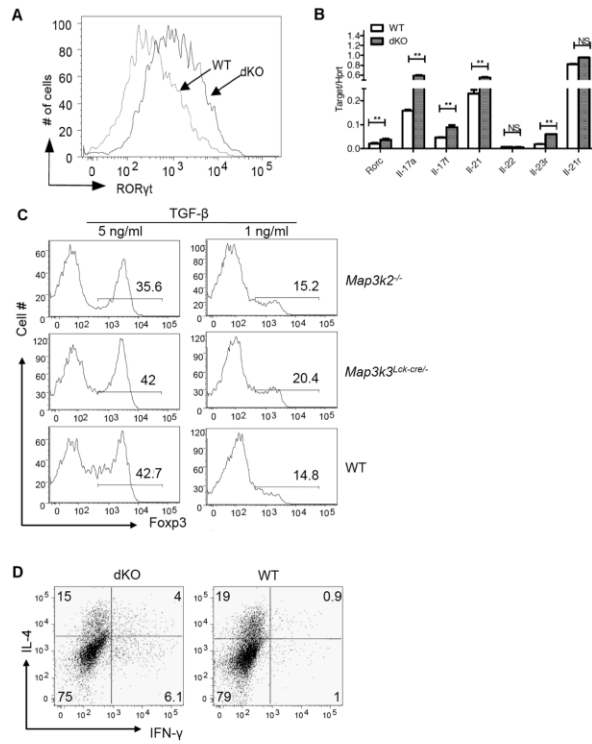

Figure S2

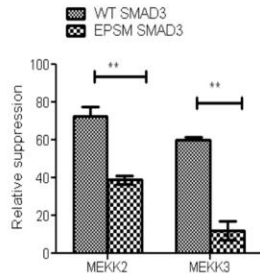

Figure S3

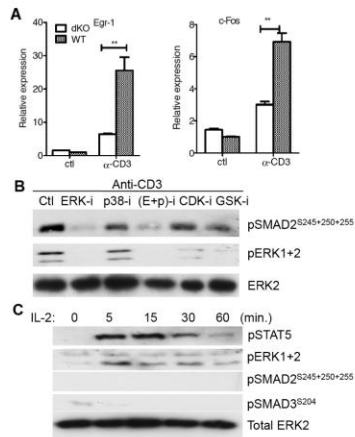

Figure S4

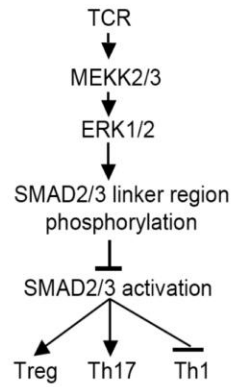

Figure S5



## **Supplementary Material and Method:**

### **Lymphocyte Staining and Flow Cytometry**

For cell surface staining, cells were washed with staining buffer (1% FBS in PBS with 0.1% NaN<sub>3</sub>), and then incubated with indicated antibodies on ice for 30 min. Cells were then washed two more times with staining buffer, and fixed in 1% paraformaldehyde in PBS before being analyzed with a LSRII machine (BD Biosciences). For intracellular cytokine staining, cells were stimulated with phorbol 12-myristate 13-acetate (PMA, Sigma) (50 ng/ml)+ionomycin (Sigma) (500 ng/ml) for 6 h in the presence of Golgistop (BD Bioscience) at 37°C for the last four h. Cells were first surface stained, fixed/permeabilized with a Cytofix/Cytoperm kit (BD Bioscience), and then stained with antibodies against indicated cytokines. Intracellular Foxp3 and T-bet staining were carried out according to manufacturer's instruction using a Foxp3 staining kit (Ebioscience). For co-staining Foxp3 with GFP, cells were fixed by Cytofix buffer (BD Bioscience), permeabilized by ice-cold methanol and stained with anti-Foxp3 antibody in the 1x Perm buffer (Ebioscience).

### **T Cell Purification and Culture**

To purify naïve CD4 T cells, splenocytes and lymph node cells were first stained with a biotin conjugated anti-CD4 antibody to enrich CD4<sup>+</sup> cells using a magnetic Biotin-selection kit (Stem cell). Enriched CD4 T cells were stained with antibodies with different color against CD4, CD25, CD62L and CD44, and the CD4<sup>+</sup>CD62L<sup>hi</sup>CD44<sup>lo</sup>CD25<sup>-</sup> population (naïve T cells) was sorted using a FACS Aria (BD Bioscience); CD4<sup>+</sup>CD62L<sup>lo</sup>CD44<sup>hi</sup> T cells were sorted as memory+activated T cells. Purity of the sorted cells was above 95%. Purified naïve CD4 T cells were stimulated with plate bound anti-CD3 antibody (3 ug/ml; 2C11) and soluble anti-CD28 antibody (2 ug/ml; 37N)

in T cell medium (RPMI 1640, 10% FBS, 1x antibiotics, 1x non-essential amino acid and 50  $\mu$ M  $\beta$ -mercaptoethanol).

### **T Helper Cell Differentiation**

Naive T cells were sorted and activated with anti-CD3+anti-CD28 under the following conditions. Th1: anti-IL-4 (5  $\mu$ g/ml; 11B11) and IL-12 (10 ng/ml; PeptoTech); Th2: anti-IFN $\gamma$  and IL-4 (10 ng/ml, Peptotech); iTreg: anti-IL4 (5  $\mu$ g/ml, 11B11), anti-IFN $\gamma$  (5  $\mu$ g/ml; R46A2), rhIL2 (100 U/ml, Peptotech) and indicated concentration of rhTGF- $\beta$ 1 (Peptotech); Th17: anti-IL4 (5  $\mu$ g/ml), anti-IFN $\gamma$  (5  $\mu$ g/ml), IL-6 (20 ng/ml, Peptotech), and indicated concentration of rhTGF- $\beta$ 1 (Peptotech). When indicated, TGF- $\beta$  antibody (5  $\mu$ g/ml; 1D11, R&D) was added into the culture.

### **Electroporation and Luciferase Assay**

T cells were transiently transfected using an Amaxa Nucleofection machine with a mouse primary T cell nucleofection kit (Lonza AG). Briefly, five million CD4 T cells were rested on ice for 1 h, and transfected with 18  $\mu$ g CAGA<sub>12</sub>-Luc and 1  $\mu$ g renilla luciferase reporter plasmids. After resting in 37°C for 4 h, cells were stimulated with plate-bound anti-CD3 antibody (5  $\mu$ g/ml) + anti-CD28 antibody (2  $\mu$ g/ml) + IL-2 (20 U/ml), and indicated concentrations of rhTGF- $\beta$  for 16 h. Cell lysate was prepared, and firefly and renilla luciferase activities were measured sequentially with a dual-Luciferase reporter kit (Promega). Results are expressed as ratios of firefly luciferase activity over renilla luciferase activity and normalized to the activity of samples without TGF- $\beta$  stimulation. For luciferase assay in 293T cells, 3 x 10<sup>5</sup> 293T cells were transfected by calcium phosphate (120  $\mu$ l H<sub>2</sub>O with DNA+ 30  $\mu$ l 1.25 M CaCl<sub>2</sub> +150  $\mu$ l 2x HBS) with 300 ng CAGA<sub>12</sub>-Luc and 20 ng renilla luciferase reporter plasmids together with 500 ng pCLNCX-*Map3k2*, pCLNCX-*Map3k3*, or empty expression vectors. Twenty-four h after

transfection, cells were starved in serum free DMEM for 5 h, then stimulated with indicated concentrations of TGF- $\beta$  for 12 h before being lysed for luciferase assay as described above.

### **Retroviral Infection**

Retrovirus were produced by transfecting Phoenix-ECO cells with LZRS-GFP, LZRS-WT SMAD3-IRES-GFP, LZRS-EPSM SMAD3 (T178V, S203A, S207A, S212A) -IRES-GFP (Calonge and Massague, 1999; Matsuura et al., 2005). Fresh viruses from the supernatants were collected 3 days later and used to infect T cells. To infect T cells, naïve T cells were first stimulated with anti-CD3 and anti-CD28 antibodies. At the 24 h and 36 h time points, activated T cells ( $1 \times 10^5$ ) were spun infected for 1 h at 2000 rpm with 500  $\mu$ l viral supernatant in the presence of polybrene (8  $\mu$ g/ml), and incubated at 37°C for 1 additional h before being removed from viral supernatant and resuspended in the indicated T cell differentiation medium.

### **Assay for the Treg Suppressive Activity *in vitro***

CD4<sup>+</sup>CD25<sup>+</sup> cells isolated from the spleen were used as Treg. WT CD4<sup>+</sup>CD25<sup>-</sup> T cells were labeled with CFSE and used as T responder cells, which were co-cultured at the indicated ratio of Treg cells and irradiated total wild type splenocytes in the presence of 1  $\mu$ g/ml anti-CD3 antibody. Proliferation of T responder cells was analyzed for CFSE dilution by flow cytometry.

### **Microarray and RT-PCR**

cDNA microarray analysis was performed on two independent pairs of FACS sorted *Mekk2/3* dKO and WT effector CD4 T cells (CD4<sup>+</sup>CD62L<sup>lo</sup>CD44<sup>hi</sup>) (Fig. S5). RNA was isolated using TRIZOL reagent (Invitrogen), followed by an RNeasy mini kit (Invitrogen). Hybridization was done using Illumina mouse gene chip II. For Real-time

RT PCR analysis, RNA was first digested with DNase I (Invitrogen) and reverse transcribed using a Reverse transcriptase II kit (Invitrogen) or iScript cDNA synthesis kit (Bio-Rad). Real-time PCR was conducted using SYBR green real time PCR master mix kit (ABI) or SsoFast EvaGreen supermix kit (Bio-Rad) on an IQ-5 multi-color real time PCR machine (Bio-Rad). The following primers were used in the study. *Il17A*: F, TCCAGAAGGCCCTCAGACTA; R, TCAGGACCAGGATCTCTTGC. *Ifny*: F, GCGTCATTGAATCACACCTG; R, TGAGCTCATTGAATGCTTGG. *Tbet*: F, GCCAGGGAACCGGTTATATG; R, GACGATCATCTGGGTCACAT. *Il17F*: F, CCCCATGGGATTACAACATCAC; R, CATTGATGCAGCCTGAGTGTCT. *Il21*: F, ATGCAGCTTTTGCCTGTTTT; R, TGGGTGTCCTTTTCTCATACG. *Rorc*: F, TGAGGCCATTCAAGTATGTGG; R, ACACCACCGTATTTGCCTTC. *Il22*: F, GCTCAACTTCACCCTGGAAG; R, TCTGGATGTTCTGGTCGTCA. *Il21R*: F, TGTC AATGTGACGGACCAGT; R, CACGTAGTTGGAGGGTTCGT. *Il23R*: F, AACATGACATGCACCTGGAA; R, TCCATGCCTAGGGAATTGAC. *Hprt*: F, GCCGAGGATTTGGAAAAAGT; R, AATCCAGCAGGTCAGCAAAG. *c-Fos*: F, ATGATGTTCTCGGGTTTCAA; R, GGC ACTAGAGACGGACAGAT. *Egr1*: F, GAGTTATCCCAGCCAAACGA; R, GGCAGAGGAAGACGATGAAG. To analyze gene expression after TCR activation, naive CD4 T cells were purified and activated with plate bound anti-CD3 (10 µg/ml) for 30min at 37 °C or left untreated. RNA was extracted with TRIZOL, and relative expression of target genes was determined with SYBR green real time PCR. Relative quantification of mRNA levels was performed using the  $\Delta\Delta Ct$  method. Briefly, the target gene amount was normalized to the endogenous reference (HPRT) and then compared against a calibrator (naive wild type T cells without stimulation), using the formula  $2^{-\Delta\Delta Ct}$ .  $\Delta\Delta Ct = \Delta Ct (\text{sample}) - \Delta Ct (\text{calibrator})$ , and  $\Delta Ct = Ct (\text{target gene}) - Ct (\text{endogenous reference})$ . Ct: cycle threshold.

### **Supplementary References:**

Calonge, M.J., and Massague, J. (1999). Smad4/DPC4 silencing and hyperactive Ras jointly disrupt transforming growth factor-beta antiproliferative responses in colon cancer cells. *J Biol Chem* 274, 33637-33643.

Guo, Z., Clydesdale, G., Cheng, J., Kim, K., Gan, L., McConkey, D.J., Ullrich, S.E., Zhuang, Y., and Su, B. (2002). Disruption of Mekk2 in mice reveals an unexpected role for MEKK2 in modulating T-cell receptor signal transduction. *Mol Cell Biol* 22, 5761-5768.

Matsuura, I., Wang, G., He, D., and Liu, F. (2005). Identification and characterization of ERK MAP kinase phosphorylation sites in Smad3. *Biochemistry* 44, 12546-12553.

Wang, X., Chang, X., Facchinetti, V., Zhuang, Y., and Su, B. (2009). MEKK3 is essential for lymphopenia-induced T cell proliferation and survival. *J Immunol* 182, 3597-3608.
