# Supplementary material
Source: PubMed Central journal article supplement (PMC3073014)
Supplement: NIHMS275874-supplement-02.pdf [file NIHMS275874-supplement-02.pdf]

Supplementary table S1

| Probe ID  | fold change 1 | fold change 2 | wt mem1     | wt mem2     | dko mem1   | dko mem2    | Gene name         |                                                                                                                           |
|-----------|---------------|---------------|-------------|-------------|------------|-------------|-------------------|---------------------------------------------------------------------------------------------------------------------------|
| ILMN_1217 | -437.05       | -0.35         | 138.9       | 11.6        | 0.3        | 33.4        | LOC675759         | PREDICTED: similar to Igh-1a protein (LOC675759), mRNA.                                                                   |
| ILMN_2544 | -40.14        | -0.38         | 96.7        | 12.5        | 2.4        | 32.8        | LOC385277         |                                                                                                                           |
| ILMN_2491 | -29.86        | -6.03         | 223.3       | 114.3       | 7.5        | 18.9        | Trcg-V4           |                                                                                                                           |
| ILMN_2737 | -13.58        | -1.23         | 87.6        | 63.2        | 6.4        | 51.6        | Lars2             | leucyl-tRNA synthetase, mitochondrial (Lars2), nuclear gene encoding mitochondrial protein, mRNA.                         |
| ILMN_2538 | -11.75        | -1.43         | 30.0        | 5.0         | 2.6        | 3.5         | LOC381776         |                                                                                                                           |
| ILMN_1231 | -11.57        | -1.35         | 654.7       | 192.8       | 56.6       | 143.2       | LOC386520         |                                                                                                                           |
| ILMN_1218 | -11.06        | -10.72        | 622.4       | 297.8       | 56.3       | 27.8        | LOC640196         | PREDICTED: similar to T-cell receptor alpha-chain precursor VJC (LOC640196), mRNA.                                        |
| ILMN_1228 | -9.83         | -3.31         | 40.2        | 25.4        | 4.1        | 7.7         | Klra1             | killer cell lectin-like receptor, subfamily A, member 1 (Klra1), mRNA.                                                    |
| ILMN_2615 | -9.51         | -0.20         | 245.7       | 15.0        | 25.8       | 74.4        | Gm459             | PREDICTED: gene model 459, (NCBI) (Gm459), mRNA.                                                                          |
| ILMN_1215 | -9.27         | -0.73         | 119.4       | 17.9        | 12.9       | 24.6        | LOC100047316      | PREDICTED: similar to anti-MOG Z12 variable light chain (LOC100047316), mRNA.                                             |
| ILMN_2888 | -7.81         | -1.78         | 75.8        | 22.2        | 9.7        | 12.5        | Klrf1             | killer cell lectin-like receptor subfamily K, member 1 (Klrf1), mRNA.                                                     |
| ILMN_1215 | -7.23         | -1.15         | 51.6        | 31.3        | 7.1        | 16.8        | LOC100048770      | PREDICTED: similar to Ig H-chain V-JH1-region (LOC100048770), mRNA.                                                       |
| ILMN_1222 | -7.10         | -1.49         | 29.1        | 12.4        | 4.1        | 8.3         | Cd93              | CD93 antigen (Cd93), mRNA.                                                                                                |
| ILMN_1214 | -7.05         | -6.17         | 269.0       | 145.9       | 38.1       | 23.7        | Aqp9              | aquaporin 9 (Aqp9), mRNA.                                                                                                 |
| ILMN_2503 | -6.63         | -0.42         | 272.1       | 24.4        | 41.1       | 57.6        | IGKV8-31_AJ235957 | Ig_kappa_variable_8-31_3                                                                                                  |
| ILMN_2766 | -6.55         | -1.84         | 85.9        | 62.2        | 13.1       | 33.9        | LincR             | lung-inducible neuralized-related C3HC4 RING domain protein (LincR), mRNA.                                                |
| ILMN_1238 | -6.18         | -2.31         | 86.1        | 34.6        | 13.9       | 15.0        | Klre1             | killer cell lectin-like receptor family E member 1 (Klre1), mRNA.                                                         |
| ILMN_2515 | -5.98         | -1.64         | 275.7       | 403.2       | 46.1       | 245.8       | A13003817Rik      |                                                                                                                           |
| ILMN_2450 | -5.63         | -0.40         | 707.2       | 150.3       | 125.6      | 374.3       | IGLC2_J00595      | Ig_lambda_constant_2_14                                                                                                   |
| ILMN_1215 | -5.48         | -1.63         | 144.6       | 100.0       | 26.4       | 61.3        | Esd               | esterase D/formylglutathione hydrolase (Esd), mRNA.                                                                       |
| ILMN_2948 | -5.45         | -6.97         | 413.0       | 314.3       | 75.8       | 45.1        | Xcl1              | chemokine (C motif) ligand 1 (Xcl1), mRNA.                                                                                |
| ILMN_2625 | -5.25         | -2.34         | 208.9       | 207.2       | 39.8       | 88.4        | Cox6a2            | cytochrome c oxidase, subunit VI a, polypeptide 2 (Cox6a2), nuclear gene encoding mitochondrial protein, mRNA.            |
| ILMN_1245 | -5.11         | -3.68         | 516.8       | 470.8       | 101.2      | 128.0       | sc10001032.1_178  |                                                                                                                           |
| ILMN_1254 | -4.78         | -2.19         | 663.4       | 640.7       | 138.8      | 292.2       | Ly6c1             | lymphocyte antigen 6 complex, locus C1 (Ly6c1), mRNA.                                                                     |
| ILMN_2805 | -4.75         | -2.61         | 173.9       | 183.3       | 36.6       | 70.2        | Ly6d              | lymphocyte antigen 6 complex, locus D (Ly6d), mRNA.                                                                       |
| ILMN_1233 | -4.68         | -5.39         | 75.3        | 55.0        | 16.1       | 10.2        | Gbp1              | guanylate nucleotide binding protein 1 (Gbp1), mRNA.                                                                      |
| ILMN_1222 | -4.65         | -1.24         | 54.3        | 44.1        | 11.7       | 35.5        | 4930404F2ORik     |                                                                                                                           |
| ILMN_3005 | -4.49         | -1.38         | 380.6       | 434.0       | 84.8       | 315.4       | Sell              | selectin, lymphocyte (Sell), mRNA.                                                                                        |
| ILMN_1238 | -4.46         | -1.02         | 126.6       | 59.9        | 28.4       | 58.6        | Fcrla             | Fc receptor-like A (Fcrla), mRNA.                                                                                         |
| ILMN_1244 | -4.37         | -1.18         | 49.9        | 49.2        | 11.4       | 41.8        | LOC667370         | PREDICTED: similar to interferon-induced protein with tetratricopeptide repeats 3 (LOC667370), mRNA.                      |
| ILMN_1227 | -4.35         | -1.97         | 21.6        | 18.6        | 5.0        | 9.5         | Ppp2r3a           | PREDICTED: protein phosphatase 2 (formerly 2A), regulatory subunit B', alpha (Ppp2r3a), mRNA.                             |
| ILMN_2731 | -4.31         | -6.54         | 118.4       | 154.0       | 27.5       | 23.5        | Klkb5             | kallikrein 1-related peptidase b5 (Klkb5), mRNA.                                                                          |
| ILMN_2928 | -4.31         | -2.44         | 387.4       | 314.1       | 89.9       | 128.7       | Siglech           | sialic acid binding Ig-like lectin H (Siglech), mRNA.                                                                     |
| ILMN_2527 | -4.30         | -3.45         | 15.0        | 21.6        | 3.5        | 6.3         | D13Ert608e        | DNA segment, Chr 13, ERATO Doi 608, expressed (D13Ert608e), mRNA.                                                         |
| ILMN_1228 | -4.30         | -1.92         | 196.9       | 66.3        | 45.8       | 34.4        | 2610035D17Rik     | PREDICTED: RIKEN cDNA 2610035D17 gene (2610035D17Rik), mRNA.                                                              |
| ILMN_1237 | -4.19         | -3.35         | 47.3        | 36.9        | 11.3       | 11.0        | Klra3             | killer cell lectin-like receptor, subfamily A, member 3 (Klra3), mRNA.                                                    |
| ILMN_1235 | -4.15         | -1.36         | 114.6       | 71.0        | 27.6       | 52.4        | Cnr2              |                                                                                                                           |
| ILMN_1255 | -4.01         | -1.32         | 488.9       | 308.5       | 122.0      | 234.4       | Klrd1             | killer cell lectin-like receptor, subfamily D, member 1 (Klrd1), mRNA.                                                    |
| ILMN_2711 | -3.98         | -1.61         | 31.9        | 22.3        | 8.0        | 13.8        | Pip5k1b           | phosphatidylinositol-4-phosphate 5-kinase, type 1 beta (Pip5k1b), mRNA.                                                   |
| ILMN_2425 | -3.89         | -1.07         | 47.7        | 13.3        | 12.3       | 12.5        | IGKV4-90_AJ231224 | Ig_kappa_variable_4-90_22                                                                                                 |
| ILMN_2897 | -3.89         | -3.54         | 25.1        | 21.5        | 6.5        | 6.1         | Gsta4             | glutathione S-transferase, alpha 4 (Gsta4), mRNA.                                                                         |
| ILMN_2911 | -3.88         | -1.60         | 648.4       | 277.9       | 167.1      | 173.6       | EG241041          | predicted gene, EG241041 (EG241041) on chromosome 1.                                                                      |
| ILMN_2648 | -3.78         | -3.35         | 65.5        | 51.7        | 17.4       | 15.5        | Gpnmb             | glycoprotein (transmembrane) nmb (Gpnmb), mRNA.                                                                           |
| ILMN_1235 | -3.77         | -3.47         | 96.3        | 88.2        | 25.5       | 25.4        | Siglech           | sialic acid binding Ig-like lectin H (Siglech), mRNA.                                                                     |
| ILMN_2544 | -3.68         | -1.46         | 37.5        | 32.3        | 10.2       | 22.2        | 2810409M01Rik     |                                                                                                                           |
| ILMN_2954 | -3.64         | -1.10         | 103.0       | 90.5        | 28.3       | 82.4        | Oasl2             | 2'-5' oligoadenylate synthetase-like 2 (Oasl2), mRNA.                                                                     |
| ILMN_2694 | -3.64         | -3.10         | 33.1        | 104.7       | 9.1        | 33.8        | Igfbp4            |                                                                                                                           |
| ILMN_1231 | -3.56         | -2.99         | 195.8       | 113.6       | 55.1       | 38.0        | LOC268288         |                                                                                                                           |
| ILMN_1226 | -3.52         | -1.31         | 141.0       | 103.1       | 40.0       | 78.5        | OTTMUSG00000      | PREDICTED: predicted gene, OTTMUSG00000016644 (OTTMUSG00000016644), mRNA.                                                 |
| ILMN_1235 | -3.48         | -1.07         | 53.1        | 36.2        | 15.3       | 34.0        | Sic14a1           | solute carrier family 14 (urea transporter), member 1 (Sic14a1), mRNA.                                                    |
| ILMN_1220 | -3.44         | -2.20         | 72.1        | 73.4        | 20.9       | 33.4        | Ttc28             | PREDICTED: tetratricopeptide repeat domain 28 (Ttc28), mRNA.                                                              |
| ILMN_2952 | -3.38         | -3.34         | 45.8        | 27.0        | 13.6       | 8.1         | Klrb1c            | killer cell lectin-like receptor subfamily B member 1C (Klrb1c), mRNA.                                                    |
| ILMN_2944 | -3.31         | -1.56         | 433.9       | 423.2       | 130.9      | 271.5       | Ifit3             | interferon-induced protein with tetratricopeptide repeats 3 (Ifit3), mRNA.                                                |
| ILMN_2543 | -3.30         | -1.01         | 205.5       | 108.5       | 62.3       | 107.3       | 4933439C2ORik     |                                                                                                                           |
| ILMN_2604 | -3.28         | -2.26         | 31.3        | 16.2        | 9.5        | 7.2         | Havcr1            | hepatitis A virus cellular receptor 1 (Havcr1), mRNA.                                                                     |
| ILMN_3154 | -3.25         | -1.34         | 83.7        | 62.1        | 25.8       | 46.5        | P2ry14            | purinergic receptor P2Y, G-protein coupled, 14 (P2ry14), transcript variant 1, mRNA.                                      |
| ILMN_2528 | -3.24         | -1.05         | 220.7       | 148.7       | 68.2       | 142.3       | LOC623121         | PREDICTED: similar to Interferon-activatable protein 203 (Ifi-203) (Interferon-inducible protein p203) (LOC623121), mRNA. |
| ILMN_2598 | -3.22         | -2.97         | 30.0        | 31.9        | 9.3        | 10.7        | 2310010M24Rik     | RIKEN cDNA 2310010M24 gene (2310010M24Rik), mRNA.                                                                         |
| ILMN_3054 | -3.21         | -1.66         | 99.2        | 92.4        | 30.9       | 55.6        | Usp18             | ubiquitin specific peptidase 18 (Usp18), mRNA.                                                                            |
| ILMN_2915 | -3.20         | -3.23         | 186.5       | 293.6       | 58.3       | 91.0        | D13Ert608e        | DNA segment, Chr 13, ERATO Doi 608, expressed (D13Ert608e), mRNA.                                                         |
| ILMN_2766 | -3.153910433  | -5.396921804  | 156.7989428 | 245.4541078 | 49.7157247 | 45.48038989 | Klkb1             | kallikrein 1 (Klkb1), mRNA.                                                                                               |
| ILMN_1220 | -3.11         | -2.18         | 50.6        | 53.1        | 16.3       | 24.4        | LincR             | lung-inducible neuralized-related C3HC4 RING domain protein (LincR), mRNA.                                                |
| ILMN_2707 | -3.09         | -1.38         | 58.3        | 54.4        | 18.9       | 39.4        | Mgl2              | macrophage galactose N-acetyl-galactosamine specific lectin 2 (Mgl2), mRNA.                                               |
| ILMN_1257 | -3.06         | -5.69         | 538.7       | 541.7       | 176.2      | 95.2        | LOC665446         | PREDICTED: similar to T-cell receptor beta chain V region PHDS203 precursor (LOC665446), mRNA.                            |
| ILMN_1230 | -3.00         | -8.40         | 69.6        | 109.3       | 23.2       | 13.0        | A130090K04Rik     |                                                                                                                           |
| ILMN_2433 | -2.97         | -1.15         | 247.5       | 191.7       | 83.3       | 167.0       | LOC100048346      | PREDICTED: similar to ubiquitin specific protease UBP43 (LOC100048346), mRNA.                                             |
| ILMN_2638 | -2.97         | -1.53         | 288.6       | 212.7       | 97.3       | 138.6       | Tcf4              | transcription factor 4 (Tcf4), transcript variant 1, mRNA.                                                                |
| ILMN_1258 | -2.93         | -3.00         | 163.7       | 167.3       | 55.9       | 55.8        | LOC100038882      | PREDICTED: hypothetical protein LOC100038882 (LOC100038882), mRNA.                                                        |
| ILMN_2662 | -2.87         | -1.26         | 84.3        | 63.5        | 29.4       | 50.6        | Slamf9            | SLAM family member 9 (Slamf9), mRNA.                                                                                      |
| ILMN_2878 | -2.85         | -1.96         | 135.3       | 148.2       | 47.4       | 75.6        | Galnt10           | UDP-N-acetyl-alpha-D-galactosamine:polypeptide N-acetylgalactosaminyltransferase 10 (Galnt10), mRNA.                      |
| ILMN_3005 | -2.84         | -3.63         | 34.2        | 29.8        | 12.0       | 8.2         | Klra16            | killer cell lectin-like receptor, subfamily A, member 16 (Klra16), mRNA.                                                  |
| ILMN_1258 | -2.83         | -2.01         | 61.9        | 136.1       | 21.8       | 67.9        | Igfbp4            | insulin-like growth factor binding protein 4 (Igfbp4), mRNA.                                                              |
| ILMN_2658 | -2.80         | -1.24         | 71.3        | 76.3        | 25.5       | 61.5        | Rel1              | REL-like 1 (Rel1), mRNA.                                                                                                  |
| ILMN_2455 | -2.78         | -2.39         | 350.2       | 352.2       | 126.0      | 147.4       | Camk4             |                                                                                                                           |
| ILMN_2988 | -2.77         | -1.00         | 664.2       | 408.5       | 239.5      | 409.7       | Plac8             | placenta-specific 8 (Plac8), mRNA.                                                                                        |
| ILMN_1255 | -2.75         | -2.05         | 367.9       | 455.6       | 133.7      | 222.4       | Nme7              | non-metastatic cells 7, protein expressed in (nucleoside-diphosphate kinase) (Nme7), transcript variant 1, mRNA.          |
| ILMN_2767 | -2.72         | -2.66         | 154.8       | 224.2       | 56.9       | 84.4        | Atp1b1            | ATPase, Na <sup>+</sup> /K <sup>+</sup> transporting, beta 1 polypeptide (Atp1b1), mRNA.                                  |
| ILMN_1252 | -2.66         | -5.28         | 134.7       | 155.0       | 50.7       | 29.4        | Klkb27            | kallikrein 1-related peptidase b27 (Klkb27), mRNA.                                                                        |
| ILMN_2698 | -2.64         | -2.81         | 74.2        | 68.8        | 28.1       | 24.5        | 4930486L24Rik     | RIKEN cDNA 4930486L24 gene (4930486L24Rik), mRNA.                                                                         |
| ILMN_2838 | -2.64         | -2.94         | 133.2       | 137.5       | 50.5       | 46.8        | Actg2             | actin, gamma 2, smooth muscle, enteric (Actg2), mRNA.                                                                     |
| ILMN_2672 | -2.64         | -1.85         | 160.7       | 144.9       | 61.0       | 78.4        | Irf8              | interferon regulatory factor 8 (Irf8), mRNA.                                                                              |
| ILMN_2721 | -2.63         | -1.80         | 1529.0      | 1100.5      | 582.2      | 610.6       | CtsW              | cathepsin W (CtsW), mRNA.                                                                                                 |
| ILMN_2607 | -2.62         | -1.38         | 225.8       | 186.5       | 86.3       | 135.6       | Itm2a             | integral membrane protein 2A (Itm2a), mRNA.                                                                               |
| ILMN_1242 | -2.60         | -0.93         | 347.1       | 171.3       | 133.4      | 184.9       | A530055J02Rik     |                                                                                                                           |
| ILMN_2510 | -2.57         | -1.68         | 164.0       | 169.3       | 63.8       | 100.8       | Nme7              | non-metastatic cells 7, protein expressed in (nucleoside-diphosphate kinase) (Nme7), transcript variant 1, mRNA.          |
| ILMN_1241 | -2.54         | -1.52         | 123.2       | 119.4       | 48.5       | 78.7        | Anxa6             |                                                                                                                           |
| ILMN_2695 | -2.53         | -15.16        | 32.4        | 46.5        | 12.8       | 3.1         | Acta2             | actin, alpha 2, smooth muscle, aorta (Acta2), mRNA.                                                                       |
| ILMN_2977 | -2.52         | -5.59         | 35.9        | 44.8        | 14.2       | 8.0         | OTTMUSG00000      | predicted gene, OTTMUSG00000005737 (OTTMUSG00000005737), mRNA.                                                            |
| ILMN_2538 | -2.52         | -1.93         | 110.8       | 124.6       | 44.1       | 64.7        | 1700008H02Rik     |                                                                                                                           |
| ILMN_1225 | -2.50         | -4.30         | 121.2       | 154.7       | 48.4       | 36.0        | Klkb26            | kallikrein 1-related peptidase b26 (Klkb26), mRNA.                                                                        |
| ILMN_3044 | -2.50         | -1.10         | 143.5       | 88.5        | 57.4       | 80.6        | Sri               | sorcin (Sri), transcript variant 1, mRNA.                                                                                 |
| ILMN_1227 | -2.48         | -1.15         | 174.6       | 90.7        | 70.3       | 78.9        | Soat2             | sterol O-acetyltransferase 2 (Soat2), mRNA.                                                                               |
| ILMN_1215 | -2.48         | -1.73         | 135.4       | 141.6       | 54.6       | 81.7        | P2ry14            | purinergic receptor P2Y, G-protein coupled, 14 (P2ry14), transcript variant 1, mRNA.                                      |
| ILMN_2517 | -2.47         | -1.28         | 135.8       | 160.0       | 55.0       | 124.7       | Impact            | imprinted and ancient (Impact), mRNA.                                                                                     |
| ILMN_2814 | -2.47         | -1.11         | 84.9        | 43.6        | 34.4       | 39.3        | Oqct              | glutamyl-peptide cyclotransferase (glutamyl cyclase) (Oqct), mRNA.                                                        |
| ILMN_2648 | -2.45         | -1.37         | 63.6        | 51.2        | 26.0       | 37.3        | D11Lgp2e          |                                                                                                                           |
| ILMN_1227 | -2.43         | -1.38         | 94.5        | 92.2        | 38.9       | 66.7        | Irf7              | interferon regulatory factor 7 (Irf7), mRNA.                                                                              |
| ILMN_1248 | -2.42         | -1.32         | 76.0        | 78.5        | 31.4       | 59.3        | Tlr7              | tol-like receptor 7 (Tlr7), mRNA.                                                                                         |
| ILMN_2707 | -2.41         | -4.45         | 878.6       | 671.5       | 364.0      | 150.9       | Cd160             | CD160 antigen (Cd160), mRNA.                                                                                              |
| ILMN_2666 | -2.39         | -1.95         | 58.1        | 74.4        | 24.2       | 38.2        | Ctsa              | cathepsin A (Ctsa), transcript variant 2, mRNA.                                                                           |
| ILMN_1242 | -2.39         | -1.80         | 163.6       | 121.6       | 68.5       | 67.6        | LOC236604         | phosphatidylserine decarboxylase pseudogene (LOC236604) on chromosome 11.                                                 |
| ILMN_2625 | -2.29         | -1.66         | 277.9       | 234.0       | 121.1      | 141.2       | Ifi35             | interferon-induced protein 35 (Ifi35), mRNA.                                                                              |
| ILMN_1255 | -2.29         | -2.31         | 37.6        | 43.5        | 16.4       | 18.8        | Hs3st1            | heparan sulfate (glucosamine) 3-O-sulfotransferase 1 (Hs3st1), mRNA.                                                      |
| ILMN_1255 | -2.29         | -1.10         | 119.3       | 91.2        | 52.1       | 82.7        | Pik3ap1           | phosphoinositide-3-kinase adaptor protein 1 (Pik3ap1), mRNA.                                                              |
| ILMN_1235 | -2.28         | -1.82         | 32.7        | 40.5        | 14.3       | 22.3        | Mx2               |                                                                                                                           |

|           |       |         |        |        |        |        |               |                                                                                                                            |
|-----------|-------|---------|--------|--------|--------|--------|---------------|----------------------------------------------------------------------------------------------------------------------------|
| ILMN_3131 | -2.28 | -1.26   | 344.3  | 293.5  | 151.1  | 232.6  | Usp18         | ubiquitin specific peptidase 18 (Usp18), mRNA.                                                                             |
| ILMN_298f | -2.27 | -1.81   | 35.0   | 31.8   | 15.5   | 17.5   | Asah2         | N-acylsphingosine amidohydrolase 2 (Asah2), mRNA.                                                                          |
| ILMN_300f | -2.27 | -1.74   | 290.3  | 327.1  | 128.2  | 187.7  | Rbm13         | RNA binding motif protein 13 (Rbm13), mRNA.                                                                                |
| ILMN_313f | -2.26 | -2.37   | 35.8   | 27.5   | 15.8   | 11.6   | Trpm6         | transient receptor potential cation channel, subfamily M, member 6 (Trpm6), mRNA.                                          |
| ILMN_123f | -2.26 | -3.09   | 25.1   | 46.4   | 11.1   | 15.0   | Acb9          | ATP-binding cassette, sub-family B (MDR/TAP), member 9 (Acb9), mRNA.                                                       |
| ILMN_272f | -2.23 | -2.01   | 47.4   | 48.1   | 21.2   | 24.0   | Cdy12         | chromodomain protein, Y chromosome-like 2 (Cdy12), mRNA.                                                                   |
| ILMN_123f | -2.23 | -2.06   | 42.4   | 40.0   | 19.0   | 19.4   | Ar13          | ADP-ribosylation factor-like 3 (Ar13), mRNA.                                                                               |
| ILMN_297f | -2.21 | -1.63   | 42.1   | 37.9   | 19.0   | 23.2   | Pvr           | poliovirus receptor (Pvr), mRNA.                                                                                           |
| ILMN_315f | -2.20 | -1.56   | 52.0   | 43.9   | 23.7   | 28.1   | Tapbp         | TAP binding protein (Tapbp), transcript variant 1, mRNA.                                                                   |
| ILMN_250f | -2.19 | -2.25   | 51.5   | 56.5   | 23.5   | 25.1   | Vapb          | vesicle-associated membrane protein, associated protein B and C (Vapb), mRNA.                                              |
| ILMN_270f | -2.15 | -2.66   | 345.0  | 360.9  | 160.7  | 135.6  | Gpr83         | G protein-coupled receptor 83 (Gpr83), mRNA.                                                                               |
| ILMN_274f | -2.14 | -2.62   | 202.7  | 173.5  | 94.5   | 66.3   | Fgf13         | fibroblast growth factor 13 (Fgf13), mRNA. XM_919159                                                                       |
| ILMN_124f | -2.13 | -1.60   | 125.2  | 75.9   | 58.7   | 47.5   | Fasl          | Fas ligand (TNF superfamily, member 6) (Fasl), mRNA.                                                                       |
| ILMN_271f | -2.13 | -1.41   | 115.2  | 88.2   | 54.0   | 62.4   | Rasa2         | RAS p21 protein activator 2 (Rasa2), mRNA.                                                                                 |
| ILMN_125f | -2.13 | -1.40   | 133.1  | 126.2  | 62.6   | 90.1   | Reb1          | ras responsive element binding protein 1 (Reb1), transcript variant 1, mRNA.                                               |
| ILMN_124f | -2.11 | -1.77   | 65.4   | 92.7   | 30.9   | 52.3   | Klra17        | killer cell lectin-like receptor, subfamily A, member 17 (Klra17), mRNA.                                                   |
| ILMN_122f | -2.11 | -1.08   | 433.4  | 331.4  | 205.8  | 306.9  | Egr3          |                                                                                                                            |
| ILMN_122f | -2.09 | -1.42   | 272.6  | 216.6  | 130.1  | 152.6  | Arsb          | arylsulfatase B (Arbs), mRNA.                                                                                              |
| ILMN_125f | -2.09 | -1.57   | 52.3   | 43.2   | 25.0   | 27.4   | Mtap7         | microtubule-associated protein 7 (Mtap7), mRNA.                                                                            |
| ILMN_123f | -2.09 | -2.80   | 27.5   | 23.2   | 13.2   | 8.3    | 9830005G06Rik |                                                                                                                            |
| ILMN_292f | -2.09 | -1.89   | 673.0  | 578.5  | 321.9  | 306.1  | Dusp6         | dual specificity phosphatase 6 (Dusp6), mRNA.                                                                              |
| ILMN_123f | -2.08 | -1.39   | 98.1   | 100.6  | 47.1   | 72.5   | LOC277837     |                                                                                                                            |
| ILMN_265f | -2.08 | -1.86   | 243.4  | 184.6  | 116.9  | 99.2   | Folr4         | folate receptor 4 (delta) (Folr4), transcript variant 2, mRNA.                                                             |
| ILMN_259f | -2.08 | -2.57   | 37.8   | 27.5   | 18.2   | 10.7   | Igf2          | insulin-like growth factor 2 (Igf2), mRNA.                                                                                 |
| ILMN_267f | -2.08 | -1.74   | 45.8   | 52.8   | 22.0   | 30.4   | 2310047A01Rik | PREDICTED: RIKEN cDNA 2310047A01 gene (2310047A01Rik), mRNA.                                                               |
| ILMN_277f | -2.05 | -1.19   | 204.5  | 194.6  | 99.9   | 163.8  | Tmem55b       | transmembrane protein 55b (Tmem55b), mRNA. XM_919952 XM_919965                                                             |
| ILMN_281f | -2.05 | -1.02   | 669.0  | 428.8  | 327.1  | 420.4  | Dnajc15       | Dnaj (Hsp40) homolog, subfamily C, member 15 (Dnajc15), mRNA.                                                              |
| ILMN_276f | -2.03 | -1.55   | 160.9  | 109.5  | 79.3   | 70.7   | Tbx21         | T-box 21 (Tbx21), mRNA.                                                                                                    |
| ILMN_121f | -2.01 | -4.58   | 45.0   | 49.2   | 22.4   | 10.7   | Arhgap26      | Rho GTPase activating protein 26 (Arhgap26), mRNA.                                                                         |
| ILMN_312f | -2.01 | -1.20   | 392.8  | 285.6  | 195.7  | 237.9  | Sytl2         | synaptotagmin-like 2 (Sytl2), transcript variant 5, mRNA.                                                                  |
| ILMN_124f | -2.00 | -2.25   | 50.8   | 60.2   | 25.4   | 26.7   | Plekhh2       | pleckstrin homology domain containing, family G (with RhoGef domain) member 2 (Plekhh2), transcript variant 1, mRNA.       |
| ILMN_273f | -2.00 | -1.16   | 168.2  | 123.3  | 84.2   | 106.7  | Sqle          | squalene epoxidase (Sqle), mRNA.                                                                                           |
| ILMN_269f | -1.99 | -2.04   | 87.4   | 90.9   | 43.8   | 44.4   | Msrb2         | methionine sulfoxide reductase B2 (Msrb2), mRNA.                                                                           |
| ILMN_274f | -1.99 | -2.33   | 54.4   | 43.1   | 27.3   | 18.5   | A230050P2ORik | RIKEN cDNA A230050P20 gene (A230050P2ORik), mRNA.                                                                          |
| ILMN_124f | -1.99 | -2.06   | 70.4   | 98.2   | 35.4   | 47.6   | Tbxa2r        | thromboxane A2 receptor (Tbxa2r), mRNA.                                                                                    |
| ILMN_282f | -1.97 | -1.53   | 67.4   | 87.3   | 34.2   | 57.2   | Ccr7          | chemokine (C-C motif) receptor 7 (Ccr7), mRNA.                                                                             |
| ILMN_125f | -1.97 | -1.22   | 357.3  | 256.6  | 181.7  | 210.3  | Oas1g         | 2'-5' oligoadenylate synthetase 1G (Oas1g), mRNA.                                                                          |
| ILMN_260f | -1.96 | -2.16   | 807.7  | 900.1  | 411.1  | 416.6  | Cot11         |                                                                                                                            |
| ILMN_267f | -1.95 | -103.63 | 204.0  | 316.1  | 104.5  | 3.1    | Riok1         | RIO kinase 1 (yeast) (Riok1), mRNA.                                                                                        |
| ILMN_125f | -1.95 | -2.21   | 151.4  | 167.6  | 77.6   | 75.7   | Klf7          | Kruppel-like factor 7 (ubiquitous) (Klf7), mRNA.                                                                           |
| ILMN_121f | -1.95 | -1.20   | 2640.9 | 971.2  | 1357.5 | 808.5  | Nkg7          | natural killer cell group 7 sequence (Nkg7), mRNA.                                                                         |
| ILMN_250f | -1.94 | -1.98   | 236.2  | 141.6  | 121.7  | 71.6   | 4733401I05Rik |                                                                                                                            |
| ILMN_288f | -1.94 | -1.51   | 82.8   | 55.5   | 42.7   | 36.7   | Slc45a4       | solute carrier family 45, member 4 (Slc45a4), mRNA. XM_898255 XM_898268 XM_907823 XM_920555 XM_920562 XM_9205              |
| ILMN_288f | -1.94 | -1.31   | 104.9  | 93.0   | 54.1   | 71.2   | Apob48r       | apolipoprotein B48 receptor (Apob48r), mRNA.                                                                               |
| ILMN_124f | -1.93 | -1.28   | 234.0  | 206.6  | 121.2  | 161.2  | Mpeg1         | macrophage expressed gene 1 (Mpeg1), mRNA.                                                                                 |
| ILMN_121f | -1.93 | -3.20   | 18.4   | 29.2   | 9.5    | 9.1    | LOC100044158  | PREDICTED: hypothetical protein LOC100044158 (LOC100044158), mRNA.                                                         |
| ILMN_268f | -1.93 | -2.05   | 777.3  | 697.7  | 403.8  | 341.0  | Irfng         | interferon gamma (Irfng), mRNA.                                                                                            |
| ILMN_121f | -1.92 | -1.20   | 810.8  | 597.9  | 421.2  | 421.2  | LOC623121     | PREDICTED: similar to Interferon-activatable protein 203 (Ifi-203) (Interferon-inducible protein p203) (LOC623121), mRNA.  |
| ILMN_272f | -1.92 | -4.17   | 39.7   | 46.5   | 20.6   | 11.2   | Eps8l1        | EPS8-like 1 (Eps8l1), mRNA.                                                                                                |
| ILMN_294f | -1.92 | -1.89   | 626.3  | 615.8  | 325.9  | 325.6  | 4933439C2ORik | RIKEN cDNA 4933439C20 gene (4933439C2ORik), mRNA.                                                                          |
| ILMN_249f | -1.91 | -2.09   | 35.9   | 44.1   | 18.8   | 21.1   | Wasf2         | WAS protein family, member 2 (Wasf2), mRNA.                                                                                |
| ILMN_268f | -1.91 | -1.88   | 117.8  | 106.3  | 61.7   | 56.6   | 1500019G21Rik | RIKEN cDNA 1500019G21 gene (1500019G21Rik), mRNA.                                                                          |
| ILMN_266f | -1.91 | -2.12   | 145.3  | 105.2  | 76.2   | 49.5   | Prg4          |                                                                                                                            |
| ILMN_270f | -1.90 | -1.41   | 192.4  | 134.1  | 101.4  | 95.2   | Gimap5        | GTPase, IMAP family member 5 (Gimap5), mRNA.                                                                               |
| ILMN_261f | -1.89 | -1.57   | 70.4   | 77.4   | 37.2   | 49.4   | 583041710Rik  | PREDICTED: RIKEN cDNA 583041710 gene (583041710Rik), mRNA.                                                                 |
| ILMN_270f | -1.89 | -1.15   | 346.8  | 261.5  | 183.4  | 228.4  | Eps11         | epithelial stromal interaction 1 (breast) (Eps11), transcript variant a, mRNA.                                             |
| ILMN_257f | -1.89 | -2.61   | 157.6  | 291.2  | 83.4   | 111.8  | C430002D13Rik |                                                                                                                            |
| ILMN_275f | -1.89 | -3.46   | 35.7   | 32.0   | 18.9   | 9.2    | Ppap2a        | phosphatidic acid phosphatase 2a (Ppap2a), transcript variant 1, mRNA.                                                     |
| ILMN_123f | -1.88 | -1.20   | 347.0  | 340.9  | 184.2  | 284.6  | EGG29383      | PREDICTED: predicted gene, EGG29383, transcript variant 2 (EGG29383), mRNA.                                                |
| ILMN_241f | -1.88 | -2.09   | 80.6   | 65.9   | 42.8   | 31.5   | Cacna1d       | calcium channel, voltage-dependent, L type, alpha 1D subunit (Cacna1d), transcript variant 2, mRNA.                        |
| ILMN_125f | -1.88 | -1.19   | 169.5  | 200.5  | 90.2   | 168.8  | Acpl2         | acid phosphatase-like 2 (Acpl2), mRNA.                                                                                     |
| ILMN_258f | -1.88 | -1.64   | 159.5  | 129.0  | 84.9   | 78.8   | Bmp7          | bone morphogenetic protein 7 (Bmp7), mRNA.                                                                                 |
| ILMN_310f | -1.87 | -1.99   | 49.5   | 74.0   | 26.4   | 37.2   | Gm129         | gene model 129, (NCBI) (Gm129), mRNA. XM_907670 XM_920513 XM_920520 XM_920527 XM_920533                                    |
| ILMN_287f | -1.87 | -1.91   | 37.9   | 39.9   | 20.3   | 20.9   | Upb1          | ureidopropionase, beta (Upb1), mRNA.                                                                                       |
| ILMN_124f | -1.87 | -1.49   | 78.2   | 70.2   | 41.9   | 47.2   | 2700025J07Rik |                                                                                                                            |
| ILMN_299f | -1.86 | -2.05   | 51.6   | 71.4   | 27.7   | 34.9   | Zfp646        | zinc finger protein 646 (Zfp646), mRNA.                                                                                    |
| ILMN_123f | -1.85 | -1.27   | 216.0  | 215.7  | 116.8  | 169.9  | Pld4          | phospholipase D family, member 4 (Pld4), mRNA.                                                                             |
| ILMN_121f | -1.84 | -1.28   | 355.3  | 242.6  | 192.9  | 189.3  | Ddx5          | DEAD (Asp-Glu-Ala-Asp) box polypeptide 5 (Ddx5), mRNA.                                                                     |
| ILMN_313f | -1.84 | -3.89   | 554.9  | 541.1  | 302.3  | 139.2  | Btdb11        | BTB (POZ) domain containing 11 (Btdb11), transcript variant 2, mRNA.                                                       |
| ILMN_269f | -1.83 | -1.42   | 393.5  | 306.0  | 214.9  | 215.2  | St3gal6       | ST3 beta-galactoside alpha-2,3-sialyltransferase 6 (St3gal6), mRNA.                                                        |
| ILMN_266f | -1.82 | -1.96   | 44.0   | 52.5   | 24.1   | 26.8   | Atp2a1        | ATPase, Ca++ transporting, cardiac muscle, fast twitch 1 (Atp2a1), mRNA.                                                   |
| ILMN_264f | -1.82 | -1.49   | 129.4  | 111.8  | 71.0   | 74.9   | Nfatc1        | nuclear factor of activated T-cells, cytoplasmic, calcineurin-dependent 1 (Nfatc1), transcript variant 1, mRNA.            |
| ILMN_266f | -1.82 | -1.63   | 68.8   | 56.4   | 37.9   | 34.6   | St6galnac4    | ST6 (alpha-N-acetylneuraminyl-2,3-beta-galactosyl-1,3)-N-acetylglucosaminide alpha-2,6-sialyltransferase 4 (St6galnac4), r |
| ILMN_315f | -1.81 | -1.30   | 173.3  | 143.7  | 95.6   | 110.5  | Aspscr1       | alveolar soft part sarcoma chromosome region, candidate 1 (human) (Aspscr1), transcript variant 2, mRNA.                   |
| ILMN_289f | -1.81 | -1.98   | 436.3  | 510.2  | 240.9  | 258.2  | Hsd3b2        | hydroxy-delta-5-steroid dehydrogenase, 3 beta- and steroid delta-isomerase 2 (Hsd3b2), mRNA.                               |
| ILMN_267f | -1.81 | -1.26   | 243.2  | 174.5  | 134.6  | 138.2  | Sigirr        | single immunoglobulin and toll-interleukin 1 receptor (TIR) domain (Sigirr), mRNA.                                         |
| ILMN_125f | -1.81 | -1.67   | 58.8   | 59.5   | 32.5   | 35.6   | Zfp162        |                                                                                                                            |
| ILMN_313f | -1.80 | -1.86   | 50.6   | 53.4   | 28.1   | 28.7   | Bcat1         | branched chain aminotransferase 1, cytosolic (Bcat1), transcript variant 2, mRNA.                                          |
| ILMN_122f | -1.77 | -1.61   | 59.9   | 68.9   | 33.8   | 42.7   | LOC100045419  | PREDICTED: similar to helios (LOC100045419), mRNA.                                                                         |
| ILMN_253f | -1.76 | -1.54   | 448.7  | 454.2  | 255.4  | 294.2  | LOC385825     |                                                                                                                            |
| ILMN_314f | -1.76 | -1.46   | 354.1  | 340.9  | 201.6  | 233.5  | Rapgef1       | Rap guanine nucleotide exchange factor (GEF) 1 (Rapgef1), transcript variant 2, mRNA.                                      |
| ILMN_269f | -1.76 | -1.23   | 369.5  | 316.8  | 210.5  | 257.4  | Cdk4          | cyclin-dependent kinase 4 (Cdk4), mRNA.                                                                                    |
| ILMN_124f | -1.75 | -2.35   | 32.2   | 47.7   | 18.4   | 20.3   | 1110014K08Rik | RIKEN cDNA 1110014K08 gene (1110014K08Rik), mRNA.                                                                          |
| ILMN_270f | -1.74 | -2.23   | 73.9   | 69.7   | 42.4   | 31.2   | Pabpc1        | poly A binding protein, cytoplasmic 1 (Pabpc1), mRNA.                                                                      |
| ILMN_286f | -1.74 | -1.37   | 168.8  | 157.8  | 97.0   | 115.0  | Gbp6          | guanylate binding protein 6 (Gbp6), mRNA.                                                                                  |
| ILMN_278f | -1.73 | -2.16   | 71.4   | 75.8   | 41.2   | 35.2   | Arhgef2       | rho/rac guanine nucleotide exchange factor (GEF) 2 (Arhgef2), mRNA.                                                        |
| ILMN_291f | -1.73 | -1.40   | 144.3  | 146.7  | 83.4   | 105.1  | Dhx58         | DEXH (Asp-Glu-X-His) box polypeptide 58 (Dhx58), mRNA.                                                                     |
| ILMN_269f | -1.72 | -1.70   | 85.0   | 94.8   | 49.5   | 55.9   | Mscp          |                                                                                                                            |
| ILMN_125f | -1.71 | -3.37   | 24.2   | 42.7   | 14.2   | 12.7   | Adam11        | a disintegrin and metallopeptidase domain 11 (Adam11), mRNA.                                                               |
| ILMN_244f | -1.70 | -1.95   | 107.6  | 108.2  | 63.1   | 55.4   | Tnk2          | tyrosine kinase, non-receptor, 2 (Tnk2), mRNA.                                                                             |
| ILMN_125f | -1.70 | -1.46   | 194.5  | 187.1  | 114.4  | 128.1  | Wdr43         | PREDICTED: WD repeat domain 43, transcript variant 9 (Wdr43), mRNA.                                                        |
| ILMN_276f | -1.70 | -1.94   | 70.6   | 69.5   | 41.6   | 35.8   | Abcf1         | ATP-binding cassette, sub-family F (GCN20), member 1 (Abcf1), mRNA.                                                        |
| ILMN_124f | -1.70 | -1.60   | 358.1  | 422.9  | 211.1  | 265.1  | LOC386021     |                                                                                                                            |
| ILMN_125f | -1.69 | -1.90   | 191.9  | 272.6  | 113.3  | 143.6  | Foxp1         | forkhead box P1 (Foxp1), mRNA.                                                                                             |
| ILMN_249f | -1.69 | -1.62   | 241.5  | 257.7  | 142.7  | 158.8  | Trim27        |                                                                                                                            |
| ILMN_296f | -1.69 | -1.19   | 3803.1 | 3358.0 | 2252.8 | 2829.5 | Rpl36al       | ribosomal protein L36a-like (Rpl36al), mRNA.                                                                               |
| ILMN_245f | -1.69 | -2.34   | 34.3   | 39.6   | 20.4   | 16.9   | Tyk2          | tyrosine kinase 2 (Tyk2), mRNA.                                                                                            |
| ILMN_265f | -1.68 | -1.53   | 117.6  | 153.7  | 70.2   | 100.6  | Ptp4a3        | protein tyrosine phosphatase 4a3 (Ptp4a3), mRNA.                                                                           |
| ILMN_289f | -1.67 | -1.19   | 7925.9 | 7127.8 | 4760.0 | 5996.5 | Rps6          | ribosomal protein S6 (Rps6), mRNA.                                                                                         |
| ILMN_263f | -1.66 | -2.03   | 92.8   | 115.4  | 55.8   | 56.8   | Srm           | spermidine synthase (Srm), mRNA.                                                                                           |
| ILMN_272f | -1.66 | -1.94   | 59.1   | 83.0   | 35.6   | 42.7   | Khk           | ketohexokinase (Khk), mRNA.                                                                                                |
| ILMN_273f | -1.66 | -1.99   | 98.0   | 156.6  | 59.0   | 78.8   | Sidt2         | SID1 transmembrane family, member 2 (Sidt2), mRNA.                                                                         |
| ILMN_259f | -1.64 | -2.01   | 1804.1 | 1455.4 | 1099.8 | 724.5  | Gimap7        | GTPase, IMAP family member 7 (Gimap7), mRNA.                                                                               |
| ILMN_121f | -1.64 | -1.74   | 74.6   | 67.9   | 45.6   | 39.0   | Hace1         | HECT domain and ankyrin repeat containing, E3 ubiquitin protein ligase 1 (Hace1), mRNA.                                    |
| ILMN_267f | -1.63 | -1.54   | 1643.1 | 1860.2 | 1005.3 | 1205.3 | Pabpn1        | poly(A) binding protein, nuclear 1 (Pabpn1), mRNA.                                                                         |
| ILMN_267f | -1.63 | -3.28   | 198.7  | 312.7  | 122.1  | 95.4   | Snrp70        | U1 small nuclear ribonucleoprotein polypeptide A (Snrp70), mRNA.                                                           |
| ILMN_286f | -1.63 | -2.36   | 76.6   | 91.1   | 47.1   | 38.6   | Pigt          | phosphatidylinositol glycan anchor biosynthesis, class T (Pigt), mRNA. XM_922599                                           |

|           |       |       |        |        |        |        |                                                    |                                                                                                                   |
|-----------|-------|-------|--------|--------|--------|--------|----------------------------------------------------|-------------------------------------------------------------------------------------------------------------------|
| ILMN_1233 | -1.63 | -1.79 | 548.9  | 541.7  | 337.6  | 302.7  | Cd27                                               | CD27 antigen (Cd27), transcript variant 1, mRNA.                                                                  |
| ILMN_1233 | -1.62 | -2.37 | 320.3  | 331.7  | 197.3  | 139.9  | Pkp4                                               | plakophilin 4 (Pkp4), transcript variant 2, mRNA.                                                                 |
| ILMN_2606 | -1.62 | -1.30 | 1016.5 | 1014.0 | 626.5  | 780.0  | Gpsn2                                              | glycoprotein, synaptic 2 (Gpsn2), mRNA.                                                                           |
| ILMN_1233 | -1.62 | -2.27 | 334.8  | 464.2  | 206.7  | 204.2  | Dgkz                                               | diacylglycerol kinase zeta (Dgkz), mRNA.                                                                          |
| ILMN_1258 | -1.62 | -1.95 | 512.0  | 719.5  | 316.5  | 369.4  | LOC386078                                          |                                                                                                                   |
| ILMN_2684 | -1.62 | -5.40 | 27.5   | 33.5   | 17.0   | 6.2    | Rec8                                               | REC8 homolog (yeast) (Rec8), mRNA.                                                                                |
| ILMN_2634 | -1.61 | -1.37 | 183.8  | 165.2  | 113.8  | 120.4  | Irf9                                               | interferon regulatory factor 9 (Irf9), mRNA.                                                                      |
| ILMN_2654 | -1.61 | -1.48 | 862.9  | 839.4  | 535.3  | 567.8  | Sesn1                                              | sestrin 1 (Sesn1), mRNA.                                                                                          |
| ILMN_3006 | -1.61 | -1.38 | 1630.4 | 1750.9 | 1014.0 | 1269.6 | Dusp2                                              | dual specificity phosphatase 2 (Dusp2), mRNA.                                                                     |
| ILMN_1233 | -1.61 | -2.01 | 94.8   | 220.5  | 59.0   | 109.9  | EG244911                                           | PREDICTED: predicted gene, EG244911, transcript variant 2 (EG244911), mRNA.                                       |
| ILMN_1233 | -1.61 | -1.56 | 546.1  | 545.9  | 340.0  | 350.6  | LOC386218                                          |                                                                                                                   |
| ILMN_3138 | -1.60 | -1.40 | 373.8  | 296.3  | 232.9  | 211.1  | Sesn1                                              | sestrin 1 (Sesn1), mRNA.                                                                                          |
| ILMN_2571 | -1.60 | -1.80 | 256.2  | 277.1  | 159.9  | 154.1  | 9830169E20Rik                                      |                                                                                                                   |
| ILMN_2588 | -1.60 | -1.61 | 162.9  | 172.9  | 102.0  | 107.5  | Ikbkb                                              | 107.5 Ikbkb                                                                                                       |
| ILMN_2762 | -1.60 | -1.88 | 57.4   | 57.2   | 36.0   | 30.5   | Pias2                                              | protein inhibitor of activated STAT 2 (Pias2), mRNA. XM_990276 XM_990305 XM_990333                                |
| ILMN_2728 | -1.59 | -1.80 | 1111.1 | 1082.6 | 697.5  | 600.9  | B4galnt1                                           | beta-1,4-N-acetyl-galactosaminyl transferase 1 (B4galnt1), mRNA.                                                  |
| ILMN_1252 | -1.59 | -1.40 | 194.5  | 202.0  | 122.2  | 143.9  | Stambpl1                                           | Stam binding protein like 1 (Stambpl1), mRNA.                                                                     |
| ILMN_2600 | -1.59 | -1.94 | 89.0   | 127.5  | 55.9   | 65.8   | Ppp1r12a                                           | protein phosphatase 1, regulatory (inhibitor) subunit 12A (Ppp1r12a), mRNA. XM_902141 XM_902142 XM_902144 XM_9177 |
| ILMN_1222 | -1.59 | -2.46 | 44.1   | 35.1   | 27.8   | 14.2   | Slc43a1                                            | solute carrier family 43, member 1 (Slc43a1), transcript variant 3, mRNA.                                         |
| ILMN_1252 | -1.58 | -2.94 | 39.8   | 84.3   | 25.1   | 28.7   | LOC380878                                          |                                                                                                                   |
| ILMN_2678 | -1.58 | -1.30 | 675.8  | 695.2  | 426.5  | 534.4  | Eif5a                                              | eukaryotic translation initiation factor 5A (Eif5a), mRNA.                                                        |
| ILMN_1222 | -1.58 | -1.32 | 1442.4 | 1211.7 | 911.6  | 919.1  | Capzb                                              | capping protein (actin filament) muscle Z-line, beta (Capzb), transcript variant 1, mRNA.                         |
| ILMN_1222 | -1.58 | -1.35 | 655.0  | 618.8  | 415.7  | 456.8  | Snrpd1                                             | small nuclear ribonucleoprotein D1 (Snrpd1), mRNA.                                                                |
| ILMN_2630 | -1.57 | -2.46 | 40.1   | 37.2   | 25.5   | 15.1   | Syp                                                | synaptophysin (Syp), mRNA.                                                                                        |
| ILMN_1252 | -1.57 | -1.87 | 1503.5 | 2079.0 | 957.1  | 1114.7 | Mela                                               | 1114.7 Mela                                                                                                       |
| ILMN_2556 | -1.57 | -2.13 | 43.8   | 53.9   | 27.9   | 25.3   | 6430526N21Rik                                      |                                                                                                                   |
| ILMN_3158 | -1.57 | -1.76 | 118.0  | 146.5  | 75.2   | 83.4   | Slc9a8                                             | solute carrier family 9 (sodium/hydrogen exchanger), member 8 (Slc9a8), transcript variant 2, mRNA.               |
| ILMN_2652 | -1.57 | -1.73 | 182.9  | 210.2  | 116.7  | 121.2  | Ddit3                                              | DNA-damage inducible transcript 3 (Ddit3), mRNA.                                                                  |
| ILMN_2644 | -1.57 | -2.22 | 456.1  | 291.3  | 291.3  | 249.7  | Lrig1                                              | leucine-rich repeats and immunoglobulin-like domains 1 (Lrig1), mRNA.                                             |
| ILMN_2752 | -1.56 | -1.54 | 151.5  | 170.1  | 97.1   | 110.3  | 1110032A13Rik                                      | RIKEN cDNA 1110032A13 gene (1110032A13Rik), mRNA.                                                                 |
| ILMN_2592 | -1.56 | -1.55 | 356.9  | 345.7  | 229.0  | 223.3  | Map3k3                                             | mitogen-activated protein kinase kinase kinase 3 (Map3k3), mRNA.                                                  |
| ILMN_1244 | -1.56 | -1.76 | 377.0  | 461.0  | 242.2  | 262.2  | Ykt6                                               | YKT6 homolog (S. Cerevisiae) (Ykt6), mRNA.                                                                        |
| ILMN_1222 | -1.55 | -1.72 | 255.9  | 365.3  | 164.8  | 213.0  | Gart                                               | phosphoribosylglycinamide formyltransferase (Gart), mRNA.                                                         |
| ILMN_1254 | -1.55 | -1.34 | 1035.8 | 926.5  | 669.1  | 690.3  | LOC100044538                                       | PREDICTED: similar to immunity-associated nucleotide 4 (LOC100044538), misc RNA.                                  |
| ILMN_2622 | -1.54 | -2.33 | 47.3   | 69.1   | 30.7   | 29.7   | 2410004N11Rik                                      |                                                                                                                   |
| ILMN_1222 | -1.54 | -1.48 | 405.3  | 493.8  | 262.9  | 332.9  | LOC383010                                          |                                                                                                                   |
| ILMN_2652 | -1.54 | -1.94 | 51.0   | 64.2   | 33.1   | 33.1   | Pik3cd                                             | phosphatidylinositol 3-kinase catalytic delta polypeptide (Pik3cd), transcript variant 1, mRNA.                   |
| ILMN_1266 | -1.54 | -1.36 | 575.6  | 488.9  | 373.9  | 359.2  | Mif                                                | 359.2 Mif                                                                                                         |
| ILMN_2652 | -1.54 | -2.02 | 109.8  | 150.7  | 71.4   | 74.6   | Gcn5l2                                             | GCN5 general control of amino acid synthesis-like 2 (yeast) (Gcn5l2), transcript variant 2, mRNA.                 |
| ILMN_1244 | -1.54 | -1.48 | 241.2  | 246.8  | 157.0  | 166.5  | Nol5a                                              | nucleolar protein 5A (Nol5a), mRNA.                                                                               |
| ILMN_2866 | -1.53 | -1.55 | 229.3  | 268.3  | 150.2  | 173.2  | Tfrc                                               | transferrin receptor (Tfrc), mRNA.                                                                                |
| ILMN_2777 | -1.53 | -1.81 | 272.1  | 321.2  | 178.3  | 177.6  | Npep1                                              | 177.6 Npep1                                                                                                       |
| ILMN_2747 | -1.52 | -1.77 | 186.3  | 208.8  | 122.4  | 118.1  | Pitpnm2                                            | phosphatidylinositol transfer protein, membrane-associated 2 (Pitpnm2), mRNA.                                     |
| ILMN_1244 | -1.52 | -1.44 | 5100.6 | 5374.5 | 3361.3 | 3731.0 | EG666577                                           | PREDICTED: predicted gene, EG666577 (EG666577), mRNA.                                                             |
| ILMN_1233 | -1.52 | -3.67 | 24.8   | 28.3   | 16.4   | 7.7    | Garnl3                                             | GTPase activating RANGAP domain-like 3 (Garnl3), mRNA.                                                            |
| ILMN_1254 | -1.51 | -1.52 | 124.5  | 150.0  | 82.2   | 98.6   | Sart1                                              | squamous cell carcinoma antigen recognized by T-cells 1 (Sart1), mRNA.                                            |
| ILMN_2652 | -1.50 | -1.61 | 116.7  | 135.2  | 77.6   | 83.9   | Ppp4r1                                             | protein phosphatase 4, regulatory subunit 1 (Ppp4r1), mRNA.                                                       |
| ILMN_2712 | -1.50 | -1.67 | 107.8  | 126.6  | 71.7   | 75.7   | Lonp1                                              | lon peptidase 1, mitochondrial (Lonp1), nuclear gene encoding mitochondrial protein, mRNA.                        |
| ILMN_2642 | -1.50 | -1.79 | 106.0  | 100.6  | 70.6   | 56.2   | Sipa1                                              | signal-induced proliferation associated gene 1 (Sipa1), mRNA.                                                     |
| ILMN_2562 | -1.50 | -1.63 | 88.7   | 103.1  | 59.2   | 63.2   | B130015M16Rik                                      |                                                                                                                   |
| ILMN_2762 | -1.50 | -1.94 | 341.5  | 462.9  | 227.9  | 238.2  | Hdac7                                              | histone deacetylase 7 (Hdac7), mRNA. XM_001003311 XM_001003316 XM_001004168 XM_001004172 XM_001004178 XM_         |
| ILMN_2771 | -1.50 | -1.34 | 1125.2 | 915.3  | 751.3  | 684.2  | H2-Q8                                              | 684.2 H2-Q8                                                                                                       |
| ILMN_3152 | -1.49 | -1.62 | 158.0  | 206.9  | 105.8  | 127.4  | Bcl2l1                                             | BCL2-like 11 [apoptosis facilitator] (Bcl2l1), transcript variant 1, mRNA.                                        |
| ILMN_2812 | -1.49 | -2.02 | 206.0  | 284.9  | 137.9  | 141.0  | Bach2                                              | BTB and CNC homology 2 (Bach2), mRNA.                                                                             |
| ILMN_2600 | -1.48 | -1.58 | 941.3  | 817.7  | 634.0  | 517.3  | Lrmp                                               | 517.3 Lrmp                                                                                                        |
| ILMN_3021 | -1.48 | -1.64 | 148.1  | 176.8  | 99.8   | 108.0  | Adar                                               | adenosine deaminase, RNA-specific (Adar), transcript variant 1, mRNA.                                             |
| ILMN_2642 | -1.48 | -1.43 | 289.5  | 278.3  | 196.1  | 194.8  | Irf1                                               | interferon regulatory factor 1 (Irf1), mRNA.                                                                      |
| ILMN_1222 | -1.47 | -1.97 | 71.1   | 64.0   | 48.3   | 32.4   | Ii2rb1                                             | interleukin 12 receptor, beta 1 (Ii2rb1), mRNA.                                                                   |
| ILMN_1222 | -1.47 | -2.10 | 328.1  | 431.3  | 222.6  | 205.3  | Atf4                                               | activating transcription factor 4 (Atf4), mRNA.                                                                   |
| ILMN_1244 | -1.47 | -2.24 | 99.4   | 149.7  | 67.4   | 66.8   | Cdk5rap1                                           | CDK5 regulatory subunit associated protein 1 (Cdk5rap1), mRNA.                                                    |
| ILMN_2414 | -1.46 | -2.07 | 1695.7 | 1588.3 | 1159.8 | 766.4  | TRBV8_AE000663_T_cell_receptor_beta_variable_8_270 | 766.4 TRBV8_AE000663_T_cell_receptor_beta_variable_8_270                                                          |
| ILMN_1238 | -1.46 | -2.70 | 25.2   | 45.3   | 17.2   | 16.8   | LOC236277                                          |                                                                                                                   |
| ILMN_2812 | -1.46 | -1.65 | 268.8  | 249.6  | 184.1  | 151.3  | Tbc1d2b                                            | TBC1 domain family, member 2B (Tbc1d2b), mRNA.                                                                    |
| ILMN_2502 | -1.46 | -2.24 | 577.6  | 798.4  | 395.7  | 356.6  | A13009K04Rik                                       |                                                                                                                   |
| ILMN_2732 | -1.46 | -1.60 | 126.7  | 129.1  | 86.9   | 80.6   | Shkbp1                                             | Sh3kbp1 binding protein 1 (Shkbp1), mRNA.                                                                         |
| ILMN_2588 | -1.46 | -1.62 | 135.1  | 136.8  | 92.7   | 84.4   | Rarres2                                            | retinoic acid receptor responder (tazarotene induced) 2 (Rarres2), mRNA.                                          |
| ILMN_1238 | -1.45 | -3.39 | 72.0   | 160.9  | 49.7   | 47.4   | Camk2b                                             | calcium/calmodulin-dependent protein kinase II, beta (Camk2b), mRNA.                                              |
| ILMN_1244 | -1.44 | -2.16 | 40.9   | 73.9   | 28.3   | 34.3   | LOC386082                                          |                                                                                                                   |
| ILMN_1238 | -1.44 | -3.10 | 158.0  | 210.9  | 109.5  | 68.1   | Kik1b4                                             | kallikrein 1-related peptidase b4 (Kik1b4), mRNA.                                                                 |
| ILMN_1238 | -1.44 | -2.12 | 84.9   | 109.9  | 59.0   | 52.0   | Xdh                                                | xanthine dehydrogenase (Xdh), mRNA.                                                                               |
| ILMN_1377 | -1.44 | -1.67 | 106.8  | 122.7  | 74.2   | 73.5   | Tubb2b                                             | tubulin, beta 2b (Tubb2b), mRNA.                                                                                  |
| ILMN_3132 | -1.44 | -1.93 | 181.5  | 229.2  | 126.5  | 118.5  | 1200003107Rik                                      | RIKEN cDNA 1200003107 gene (1200003107Rik), transcript variant 3, mRNA.                                           |
| ILMN_2477 | -1.43 | -2.33 | 56.7   | 93.0   | 39.7   | 39.9   | Traf4                                              | Tnf receptor associated factor 4 (Traf4), mRNA.                                                                   |
| ILMN_2431 | -1.42 | -2.07 | 64.7   | 55.3   | 45.6   | 26.7   | Ube2l6                                             | 26.7 Ube2l6                                                                                                       |
| ILMN_3088 | -1.41 | -2.04 | 218.5  | 254.7  | 155.0  | 124.6  | Gprk6                                              | G protein-coupled receptor kinase 6 (Gprk6), transcript variant 1, mRNA.                                          |
| ILMN_1217 | -1.41 | -2.06 | 185.5  | 278.4  | 131.7  | 135.3  | C230067O06Rik                                      |                                                                                                                   |
| ILMN_1238 | -1.41 | -2.00 | 108.9  | 138.0  | 77.3   | 69.1   | Rgs3                                               | regulator of G-protein signaling 3 (Rgs3), transcript variant 2, mRNA.                                            |
| ILMN_2450 | -1.41 | -2.04 | 119.7  | 196.5  | 85.0   | 96.4   | Dusp4                                              | 96.4 Dusp4                                                                                                        |
| ILMN_2630 | -1.41 | -1.74 | 121.3  | 175.5  | 86.4   | 100.7  | Dctn4                                              | 100.7 Dctn4                                                                                                       |
| ILMN_1244 | -1.40 | -1.68 | 171.3  | 202.1  | 122.5  | 120.3  | Mbtps1                                             | membrane-bound transcription factor peptidase, site 1 (Mbtps1), mRNA.                                             |
| ILMN_2502 | -1.40 | -1.92 | 245.6  | 333.6  | 176.0  | 173.8  | Utx                                                | ubiquitously transcribed tetratricopeptide repeat gene, X chromosome (Utx), mRNA.                                 |
| ILMN_2730 | -1.39 | -1.79 | 175.1  | 211.9  | 125.6  | 118.1  | Mbd3                                               | methyl-CpG binding domain protein 3 (Mbd3), mRNA.                                                                 |
| ILMN_2622 | -1.39 | -1.68 | 140.9  | 169.4  | 101.1  | 101.0  | Nomo1                                              | nodal modulator 1 (Nomo1), mRNA.                                                                                  |
| ILMN_1266 | -1.39 | -1.80 | 95.4   | 113.2  | 68.6   | 63.1   | Orai3                                              | ORAI calcium release-activated calcium modulator 3 (Orai3), mRNA.                                                 |
| ILMN_2812 | -1.38 | -1.79 | 115.4  | 191.2  | 83.6   | 106.7  | Per1                                               | period homolog 1 (Drosophila) (Per1), mRNA.                                                                       |
| ILMN_1244 | -1.38 | -1.78 | 115.7  | 120.8  | 83.8   | 68.0   | Cd3eap                                             | CD3E antigen, epsilon polypeptide associated protein (Cd3eap), mRNA.                                              |
| ILMN_1222 | -1.38 | -1.84 | 145.0  | 165.9  | 105.0  | 90.2   | Lancl1                                             | LanC (bacterial lantibiotic synthetase component C)-like 1 (Lancl1), mRNA.                                        |
| ILMN_2944 | -1.38 | -1.56 | 513.3  | 615.1  | 372.3  | 395.0  | Bin1                                               | bridging integrator 1 (Bin1), mRNA.                                                                               |
| ILMN_2752 | -1.38 | -2.00 | 102.2  | 126.7  | 74.1   | 63.4   | 2210010N04Rik                                      |                                                                                                                   |
| ILMN_1222 | -1.38 | -2.11 | 1907.8 | 2202.6 | 1385.8 | 1044.7 | Iap                                                | 1044.7 Iap                                                                                                        |
| ILMN_2840 | -1.37 | -2.41 | 768.3  | 1392.2 | 559.2  | 576.9  | Ugcg                                               | UDP-glucose ceramide glucosyltransferase (Ugcg), mRNA.                                                            |
| ILMN_2751 | -1.37 | -2.21 | 284.9  | 348.3  | 208.5  | 158.0  | Fyn                                                | Fyn proto-oncogene (Fyn), mRNA.                                                                                   |
| ILMN_1222 | -1.37 | -1.66 | 169.1  | 174.8  | 123.8  | 105.1  | C230043G09Rik                                      |                                                                                                                   |
| ILMN_1227 | -1.37 | -1.61 | 1373.0 | 1487.6 | 1005.5 | 922.7  | Arcp1b                                             | actin related protein 2/3 complex, subunit 1B (Arcp1b), mRNA.                                                     |
| ILMN_2642 | -1.36 | -1.68 | 367.3  | 459.0  | 269.2  | 272.7  | Fermt3                                             | fermitin family homolog 3 (Drosophila) (Fermt3), mRNA.                                                            |
| ILMN_2922 | -1.36 | -1.89 | 228.0  | 343.5  | 167.2  | 182.0  | Rbm38                                              | RNA binding motif protein 38 (Rbm38), mRNA.                                                                       |
| ILMN_2712 | -1.36 | -1.85 | 407.4  | 518.9  | 299.0  | 280.4  | Eif4g1                                             | eukaryotic translation initiation factor 4, gamma 1 (Eif4g1), transcript variant 2, mRNA.                         |
| ILMN_1232 | -1.36 | -1.68 | 2050.2 | 2736.8 | 1506.9 | 1633.8 | LOC383712                                          | PREDICTED: similar to putative translation initiation factor A121/Sui1 (LOC383712), mRNA.                         |
| ILMN_2502 | -1.36 | -2.56 | 41.6   | 50.3   | 30.7   | 19.7   | mt-Nd5                                             | 19.7 mt-Nd5                                                                                                       |
| ILMN_1230 | -1.35 | -2.42 | 41.0   | 52.8   | 30.4   | 21.8   | sc10002130.1_20                                    |                                                                                                                   |
| ILMN_3062 | -1.35 | -1.99 | 184.0  | 225.4  | 136.6  | 113.0  | Rnasen                                             | ribonuclease III, nuclear (Rnasen), mRNA.                                                                         |
| ILMN_3120 | -1.35 | -3.02 | 36.6   | 65.1   | 27.2   | 21.6   | Pigk                                               | phosphatidylinositol glycan anchor biosynthesis, class K (Pigk), transcript variant 2, mRNA.                      |
| ILMN_2742 | -1.34 | -1.66 | 278.2  | 318.2  | 207.2  | 191.7  | H13                                                | histocompatibility 13 (H13), mRNA.                                                                                |
| ILMN_2680 | -1.34 | -2.01 | 100.1  | 125.3  | 74.8   | 62.3   | C79267                                             | expressed sequence C79267 (C79267), mRNA.                                                                         |
| ILMN_2682 | -1.34 | -1.55 | 1998.0 | 1985.6 | 1494.8 | 1284.3 | Hmha1                                              | histocompatibility (minor) HA-1 (Hmha1), mRNA.                                                                    |
| ILMN_1242 | -1.34 | -1.82 | 322.4  | 409.1  | 241.4  | 224.6  | Ptbp1                                              | polypyrimidine tract binding protein 1 (Ptbp1), transcript variant 1, mRNA.                                       |
| ILMN_2442 | -1.33 | -1.73 | 121.1  | 148.0  | 90.8   | 85.4   | Sf1                                                | splicing factor 1 (Sf1), mRNA. XM_979946 XM_979979                                                                |

|           |       |        |        |        |        |                                                          |                                                                                                                         |
|-----------|-------|--------|--------|--------|--------|----------------------------------------------------------|-------------------------------------------------------------------------------------------------------------------------|
| ILMN_246C | -1.33 | -1.63  | 607.6  | 760.7  | 457.5  | 467.6 Wdr1                                               | WD repeat domain 1 (Wdr1), mRNA.                                                                                        |
| ILMN_250I | -1.33 | -1.89  | 449.3  | 513.1  | 338.4  | 272.0 Tomm22                                             | translocase of outer mitochondrial membrane 22 homolog (yeast) (Tomm22), nuclear gene encoding mitochondrial protein, r |
| ILMN_271E | -1.33 | -1.60  | 413.7  | 468.0  | 311.7  | 293.1 Slc12a6                                            | solute carrier family 12, member 6 (Slc12a6), transcript variant 1, mRNA.                                               |
| ILMN_123J | -1.33 | -3.20  | 97.1   | 105.7  | 73.2   | 33.1 BC003314                                            |                                                                                                                         |
| ILMN_121A | -1.33 | -1.71  | 270.0  | 316.1  | 203.7  | 184.6 Rbc1                                               | RanBP-type and C3HC4-type zinc finger containing 1 (Rbc1), transcript variant 2, mRNA.                                  |
| ILMN_124E | -1.32 | -1.69  | 234.3  | 302.8  | 177.1  | 179.6 G330403E01Rik                                      |                                                                                                                         |
| ILMN_267I | -1.32 | -2.07  | 251.8  | 393.6  | 190.8  | 190.3 Eif3b                                              | eukaryotic translation initiation factor 3, subunit B (Eif3b), mRNA.                                                    |
| ILMN_293I | -1.32 | -2.10  | 77.8   | 111.3  | 59.0   | 53.1 Igf2r                                               | insulin-like growth factor 2 receptor (Igf2r), mRNA.                                                                    |
| ILMN_251E | -1.32 | -2.02  | 1483.9 | 1506.4 | 1126.7 | 746.1 Tcrb-V8.2                                          |                                                                                                                         |
| ILMN_123E | -1.32 | -1.96  | 158.7  | 173.1  | 120.6  | 88.1 Zfp313                                              | zinc finger protein 313 (Zfp313), mRNA.                                                                                 |
| ILMN_121E | -1.32 | -1.77  | 654.1  | 1066.5 | 497.3  | 603.5 Lcp1                                               | lymphocyte cytosolic protein 1 (Lcp1), mRNA.                                                                            |
| ILMN_312Z | -1.32 | -1.62  | 942.3  | 1006.4 | 716.5  | 620.3 Gbp2                                               | guanylate nucleotide binding protein 2 (Gbp2), mRNA.                                                                    |
| ILMN_243C | -1.31 | -1.71  | 1693.8 | 1796.5 | 1290.9 | 1048.0 Uba1                                              | ubiquitin-like modifier activating enzyme 1 (Uba1), mRNA.                                                               |
| ILMN_122C | -1.31 | -1.77  | 488.2  | 635.6  | 373.5  | 358.1 Dtx3l                                              | deltex 3-like (Drosophila) (Dtx3l), mRNA.                                                                               |
| ILMN_123J | -1.31 | -3.65  | 668.3  | 1164.5 | 511.2  | 319.4 Ly9                                                | lymphocyte antigen 9 (Ly9), mRNA.                                                                                       |
| ILMN_264E | -1.31 | -1.81  | 255.3  | 391.2  | 195.4  | 216.2 Eif2s3x                                            | eukaryotic translation initiation factor 2, subunit 3, structural gene X-linked (Eif2s3x), mRNA.                        |
| ILMN_267J | -1.31 | -2.27  | 352.1  | 544.4  | 269.7  | 240.1 Actn4                                              | actinin alpha 4 (Actn4), mRNA.                                                                                          |
| ILMN_123J | -1.30 | -1.90  | 317.6  | 381.5  | 243.4  | 201.1 H3f3b                                              | PREDICTED: H3 histone, family 3B (H3f3b), mRNA.                                                                         |
| ILMN_269E | -1.30 | -2.20  | 156.6  | 206.7  | 120.1  | 93.8 Lmbr1l                                              | limb region 1 like (Lmbr1l), mRNA.                                                                                      |
| ILMN_272A | -1.30 | -1.83  | 102.7  | 145.8  | 79.0   | 79.6 Ppp5c                                               | protein phosphatase 5, catalytic subunit (Ppp5c), mRNA.                                                                 |
| ILMN_121I | -1.29 | -1.73  | 325.5  | 435.1  | 252.0  | 251.2 Map4k2                                             | mitogen-activated protein kinase kinase kinase kinase 2 (Map4k2), mRNA.                                                 |
| ILMN_122Z | -1.29 | -1.71  | 185.0  | 252.0  | 143.3  | 147.6 Sreb2                                              | sterol regulatory element binding factor 2 (Sreb2), mRNA.                                                               |
| ILMN_260A | -1.29 | -1.65  | 276.2  | 365.7  | 214.1  | 221.7 Eftud2                                             | elongation factor Tu GTP binding domain containing 2 (Eftud2), mRNA.                                                    |
| ILMN_295E | -1.29 | -2.48  | 48.3   | 53.6   | 37.5   | 21.6 Smtn                                                | smoothelin (Smtn), mRNA.                                                                                                |
| ILMN_273I | -1.29 | -1.71  | 259.2  | 248.7  | 201.7  | 145.0 Ext1                                               | exostoses (multiple) 1 (Ext1), mRNA.                                                                                    |
| ILMN_291E | -1.28 | -1.76  | 405.6  | 457.2  | 316.3  | 260.5 Dgkz                                               | diacylglycerol kinase zeta (Dgkz), mRNA.                                                                                |
| ILMN_268E | -1.27 | -1.89  | 564.0  | 642.8  | 442.7  | 339.9 Hcls1                                              | hematopoietic cell specific Lyn substrate 1 (Hcls1), mRNA.                                                              |
| ILMN_121I | -1.27 | -5.44  | 372.1  | 387.7  | 292.2  | 71.3 Art2b                                               | ADP-ribosyltransferase 2b (Art2b), mRNA.                                                                                |
| ILMN_277E | -1.27 | -2.05  | 699.1  | 964.5  | 548.9  | 470.3 Chmp4b                                             | chromatin modifying protein 4B (Chmp4b), mRNA.                                                                          |
| ILMN_281A | -1.27 | -1.69  | 216.3  | 276.9  | 170.6  | 163.4 Cd97                                               | CD97 antigen (Cd97), mRNA.                                                                                              |
| ILMN_264I | -1.27 | -1.92  | 461.1  | 636.1  | 363.7  | 330.5 Cdc21l                                             | cell division cycle 2-like 1 (Cdc21l), mRNA.                                                                            |
| ILMN_267E | -1.26 | -1.76  | 504.2  | 537.9  | 399.7  | 306.3 H2-Q6                                              | histocompatibility 2, Q region locus 6 (H2-Q6), mRNA.                                                                   |
| ILMN_125E | -1.26 | -2.25  | 90.5   | 117.1  | 71.9   | 52.1 Snrk                                                | SNF related kinase (Snrk), mRNA.                                                                                        |
| ILMN_309E | -1.26 | -1.93  | 84.0   | 114.1  | 66.8   | 59.1 Npm3                                                | nucleoplasm 3 (Npm3), mRNA.                                                                                             |
| ILMN_267A | -1.26 | -3.17  | 137.8  | 227.2  | 109.7  | 71.6 Fus                                                 |                                                                                                                         |
| ILMN_316G | -1.25 | -4.66  | 76.2   | 126.1  | 60.8   | 27.0 A130090K04Rik                                       | RIKEN cDNA A130090K04 gene (A130090K04Rik), mRNA.                                                                       |
| ILMN_123J | -1.24 | -1.97  | 79.7   | 117.6  | 64.1   | 59.8 Ranbp3                                              | RAN binding protein 3 (Ranbp3), mRNA.                                                                                   |
| ILMN_268E | -1.24 | -1.98  | 203.7  | 345.7  | 164.2  | 174.5 Npm3-ps1                                           | nucleoplasm 3, pseudogene 1 (Npm3-ps1) on chromosome 6.                                                                 |
| ILMN_266A | -1.24 | -1.98  | 988.1  | 1089.3 | 797.4  | 550.2 Ephx1                                              | epoxide hydrolase 1, microsomal (Ephx1), mRNA.                                                                          |
| ILMN_126E | -1.24 | -2.60  | 39.9   | 71.5   | 32.2   | 27.5 Fxr2                                                | fragile X mental retardation, autosomal homolog 2 (Fxr2), mRNA.                                                         |
| ILMN_122A | -1.24 | -1.87  | 2039.2 | 2264.8 | 1650.1 | 1210.5 Gimap6                                            | GTPase, IMAP family member 6 (Gimap6), mRNA.                                                                            |
| ILMN_269E | -1.23 | -2.05  | 520.2  | 458.6  | 421.9  | 224.1 Itgal                                              | integrin alpha L (Itgal), mRNA.                                                                                         |
| ILMN_125E | -1.22 | -1.93  | 946.2  | 479.3  | 284.0  | 247.8 Eef2                                               | eukaryotic translation elongation factor 2 (Eef2), mRNA.                                                                |
| ILMN_265E | -1.22 | -1.83  | 186.1  | 267.6  | 153.1  | 146.1 A730008L03Rik                                      | RIKEN cDNA A730008L03 gene (A730008L03Rik), mRNA.                                                                       |
| ILMN_261I | -1.21 | -2.03  | 227.6  | 414.0  | 187.9  | 203.9 LOC674706                                          | PREDICTED: similar to Zinc finger protein 341 (LOC674706), mRNA.                                                        |
| ILMN_267A | -1.21 | -1.87  | 209.1  | 235.2  | 173.1  | 125.5 Agrn                                               | agrin (Agrn), mRNA.                                                                                                     |
| ILMN_122C | -1.21 | -1.64  | 2328.7 | 3576.3 | 1931.8 | 2183.6 Junb                                              | Jun-B oncogene (Junb), mRNA.                                                                                            |
| ILMN_125E | -1.20 | -1.75  | 270.6  | 436.7  | 225.4  | 249.5 Arf3                                               | ADP-ribosylation factor 3 (Arf3), mRNA.                                                                                 |
| ILMN_257J | -1.19 | -3.78  | 39.8   | 56.5   | 33.6   | 15.0 D330012P07Rik                                       |                                                                                                                         |
| ILMN_270Z | -1.17 | -2.33  | 54.8   | 107.2  | 46.8   | 46.1 Pim1                                                | proviral integration site 1 (Pim1), mRNA.                                                                               |
| ILMN_298C | -1.17 | -2.10  | 96.4   | 138.7  | 82.5   | 66.1 Idua                                                | iduronidase, alpha-L (Idua), mRNA.                                                                                      |
| ILMN_273E | -1.17 | -2.26  | 160.3  | 226.3  | 137.3  | 100.3 Numa1                                              | nuclear mitotic apparatus protein 1 (Numa1), mRNA.                                                                      |
| ILMN_121I | -1.14 | -4.04  | 110.8  | 311.8  | 97.5   | 77.1 LOC669658                                           | PREDICTED: similar to melanoma antigen (LOC669658), mRNA.                                                               |
| ILMN_124E | -1.13 | -2.98  | 120.7  | 154.8  | 107.2  | 51.9 Igf1r                                               | insulin-like growth factor 1 receptor (Igf1r), mRNA.                                                                    |
| ILMN_264I | -1.13 | -1.90  | 420.8  | 445.5  | 373.8  | 234.0 Dtx1                                               | deltex 1 homolog (Drosophila) (Dtx1), mRNA.                                                                             |
| ILMN_290I | -1.09 | -3.28  | 212.1  | 301.3  | 194.3  | 91.8 Bax                                                 | Bcl2-associated X protein (Bax), mRNA.                                                                                  |
| ILMN_293A | -1.09 | -2.89  | 122.2  | 190.2  | 112.3  | 65.7 Prpf19                                              | PRP19/PSO4 pre-mRNA processing factor 19 homolog (S. cerevisiae) (Prpf19), mRNA.                                        |
| ILMN_288C | -1.09 | -2.04  | 262.0  | 366.9  | 241.3  | 179.6 Nfrkb                                              | nuclear factor related to kappa B binding protein (Nfrkb), mRNA.                                                        |
| ILMN_121E | -1.07 | -2.31  | 224.8  | 335.3  | 210.3  | 145.4 Cops8                                              | COP9 (constitutive photomorphogenic) homolog, subunit 8 (Arabidopsis thaliana) (Cops8), mRNA.                           |
| ILMN_242I | -1.04 | -2.09  | 808.3  | 984.8  | 779.7  | 471.1 Tcrb-V8.3                                          |                                                                                                                         |
| ILMN_122Z | -1.03 | -2.15  | 332.6  | 571.9  | 324.0  | 265.8 Hspa9                                              | heat shock protein 9 (Hspa9), mRNA.                                                                                     |
| ILMN_121E | -0.97 | -3.91  | 68.5   | 125.1  | 70.7   | 32.0 A630054M16Rik                                       |                                                                                                                         |
| ILMN_125E | -0.97 | -5.49  | 54.2   | 68.8   | 56.1   | 12.5 Rpe                                                 | ribulose-5-phosphate-3-epimerase (Rpe), mRNA.                                                                           |
| ILMN_257E | -0.94 | -3.80  | 41.4   | 104.1  | 43.9   | 27.4 B930094H08Rik                                       |                                                                                                                         |
| ILMN_122Z | -0.94 | -2.36  | 189.9  | 283.8  | 202.9  | 120.2 Trpc4ap                                            | transient receptor potential cation channel, subfamily C, member 4 associated protein (Trpc4ap), mRNA.                  |
| ILMN_263E | -0.90 | -3.25  | 42.0   | 95.3   | 46.6   | 29.3 Tcf20                                               | transcription factor 20 (Tcf20), mRNA.                                                                                  |
| ILMN_265E | -0.82 | -2.93  | 139.3  | 244.5  | 169.1  | 83.3 Slc15a2                                             |                                                                                                                         |
| ILMN_272E | -0.80 | -2.93  | 128.3  | 302.7  | 159.4  | 103.5 LOC100046744                                       | PREDICTED: similar to Serine/arginine repetitive matrix protein 2 (LOC100046744), mRNA.                                 |
| ILMN_121I | -0.80 | -6.20  | 325.9  | 261.8  | 408.6  | 42.2 F830002E14Rik                                       |                                                                                                                         |
| ILMN_284E | -0.75 | -25.31 | 25.1   | 112.6  | 33.3   | 4.4 Actb                                                 | actin, beta, cytoplasmic (Actb), mRNA.                                                                                  |
| ILMN_124E | 0.06  | 66.78  | 170.4  | 4.7    | 9.7    | 316.0 IGKV9-120_V00804SJ00566_ig_kappa_variable_9-120_12 |                                                                                                                         |
| ILMN_122E | 0.07  | 41.22  | 84.5   | 4.5    | 5.8    | 184.9 LOC384422                                          |                                                                                                                         |
| ILMN_264E | 0.13  | 36.53  | 271.4  | 9.0    | 36.0   | 328.9 LOC243431                                          | PREDICTED: similar to Ig kappa chain V-V region MOPC 41 precursor (LOC243431), mRNA.                                    |
| ILMN_125E | 0.17  | 15.51  | 204.2  | 21.6   | 35.0   | 374.3 LOC384413                                          |                                                                                                                         |
| ILMN_122E | 0.21  | 16.76  | 411.9  | 43.2   | 88.5   | 724.6 LOC636944                                          | PREDICTED: similar to Ig kappa chain V-V region K2 precursor (LOC636944), mRNA.                                         |
| ILMN_123C | 0.22  | 14.77  | 475.2  | 48.6   | 102.7  | 717.8 LOC636944                                          | PREDICTED: similar to Ig kappa chain V-V region K2 precursor (LOC636944), mRNA.                                         |
| ILMN_246E | 0.30  | 33.09  | 79.7   | 8.9    | 24.2   | 296.0 LOC676136                                          | PREDICTED: similar to Ig kappa chain V-V region MPC11 precursor (LOC676136), mRNA.                                      |
| ILMN_121E | 0.32  | 51.65  | 12.3   | 1.3    | 3.9    | 68.5 LOC100047132                                        | PREDICTED: similar to monoclonal antibody 17-1A, light chain (LOC100047132), mRNA.                                      |
| ILMN_249E | 0.36  | 11.79  | 145.4  | 19.2   | 52.0   | 225.9 IGKV2-137_AJ231263_ig_kappa_variable_2-137_15      |                                                                                                                         |
| ILMN_123C | 0.38  | 8.37   | 342.5  | 37.1   | 129.2  | 310.4 Igl-V1                                             |                                                                                                                         |
| ILMN_122E | 0.38  | 15.73  | 101.8  | 9.9    | 38.8   | 156.3 LOC100046496                                       | PREDICTED: similar to Ig kappa V-region 24B (LOC100046496), mRNA.                                                       |
| ILMN_269E | 0.38  | 22.22  | 97.7   | 16.6   | 37.5   | 369.7 LOC669053                                          | PREDICTED: similar to Ig kappa chain V-V region MPC11 precursor (LOC669053), mRNA.                                      |
| ILMN_124E | 0.40  | 8.18   | 1563.0 | 140.8  | 620.4  | 1152.0 Igl-V1                                            |                                                                                                                         |
| ILMN_246E | 0.41  | 15.65  | 167.8  | 16.4   | 69.6   | 256.8 D6Mit97                                            |                                                                                                                         |
| ILMN_124E | 0.43  | 7.86   | 161.3  | 19.5   | 69.2   | 153.5 Erdr1                                              | erythroid differentiation regulator 1 (Erdr1), mRNA.                                                                    |
| ILMN_280C | 0.43  | 46.98  | 18.8   | 1.2    | 8.1    | 54.8 S100a9                                              | S100 calcium binding protein A9 (calgranulin B) (S100a9), mRNA.                                                         |
| ILMN_267A | 0.46  | 25.25  | 60.5   | 10.2   | 27.5   | 258.1 LOC676136                                          | PREDICTED: similar to Ig kappa chain V-V region MPC11 precursor (LOC676136), mRNA.                                      |
| ILMN_125E | 0.47  | 9.89   | 724.1  | 52.1   | 340.1  | 515.4 LOC381774                                          |                                                                                                                         |
| ILMN_122E | 0.51  | 7.94   | 852.2  | 72.1   | 437.0  | 572.0 Igl-V5                                             | PREDICTED: immunoglobulin kappa chain variable 5 (V5 family) (Igl-V5), mRNA.                                            |
| ILMN_125E | 0.56  | 4.50   | 406.4  | 71.8   | 227.5  | 323.3 Lyz2                                               | lysozyme 2 (Lyz2), mRNA.                                                                                                |
| ILMN_271C | 0.57  | 14.81  | 26.9   | 6.6    | 15.3   | 97.9 S100a8                                              | S100 calcium binding protein A8 (calgranulin A) (S100a8), mRNA.                                                         |
| ILMN_124E | 0.65  | 17.67  | 61.6   | 6.1    | 40.2   | 108.2 LOC385109                                          |                                                                                                                         |
| ILMN_282E | 0.74  | -91.16 | 13.2   | -2.3   | 9.8    | 208.4 Hspa1a                                             | heat shock protein 1A (Hspa1a), mRNA.                                                                                   |
| ILMN_122E | 0.78  | 8.25   | 8.9    | 5.1    | 6.9    | 42.2 Retnla                                              | resistin like alpha (Retnla), mRNA.                                                                                     |
| ILMN_121I | 0.83  | 4.52   | 70.2   | 20.0   | 58.2   | 90.3 Aif1                                                | allograft inflammatory factor 1 (Aif1), mRNA.                                                                           |
| ILMN_287E | 0.87  | 4.19   | 1469.0 | 339.9  | 1278.7 | 1425.7 Lyz                                               | lysozyme (Lyz), mRNA.                                                                                                   |
| ILMN_260E | 0.90  | 2.98   | 68.8   | 35.8   | 62.1   | 106.8 Lst1                                               |                                                                                                                         |
| ILMN_121I | 0.95  | 16.67  | 18.8   | 4.8    | 17.8   | 79.4 LOC380805                                           |                                                                                                                         |
| ILMN_265E | 0.97  | 2.94   | 192.6  | 145.6  | 185.9  | 428.4 Ifitm3                                             | interferon induced transmembrane protein 3 (Ifitm3), mRNA.                                                              |
| ILMN_259J | 0.99  | 8.58   | 17.2   | 8.3    | 17.1   | 71.2 LOC54904                                            | PREDICTED: similar to idiotype anti-NP IggG(1) heavy chain V-D-J (LOC54904), mRNA.                                      |
| ILMN_122E | 1.00  | 4.47   | 17.7   | 9.5    | 17.8   | 42.7 Fcgr2b                                              | Fc receptor, IgG, low affinity IIb (Fcgr2b), transcript variant 2, mRNA.                                                |
| ILMN_124E | 1.01  | -52.75 | 3.6    | -0.5   | 3.7    | 26.1 Lyp1a1                                              | lysophospholipase-like 1 (Lyp1a1), mRNA.                                                                                |
| ILMN_250G | 1.02  | 5.12   | 11.6   | 8.6    | 11.9   | 43.9 Tct15                                               | tetratricopeptide repeat domain 15 (Tct15), mRNA.                                                                       |
| ILMN_273I | 1.05  | 12.20  | 9.7    | 2.4    | 10.2   | 29.8 Ii5                                                 | interleukin 5 (Ii5), mRNA.                                                                                              |
| ILMN_276I | 1.07  | 2.19   | 170.2  | 140.1  | 182.5  | 307.0 Clic4                                              | chloride intracellular channel 4 (mitochondrial) (Clic4), nuclear gene encoding mitochondrial protein, mRNA.            |
| ILMN_315E | 1.08  | 14.91  | 15.7   | 3.5    | 16.9   | 52.4 Cd209b                                              | CD209b antigen (Cd209b), transcript variant 1, mRNA.                                                                    |
| ILMN_293E | 1.08  | 7.32   | 60.5   | 17.1   | 65.3   | 125.3 Lyzs                                               | lysozyme (Lyzs), mRNA.                                                                                                  |

|           |      |        |        |        |        |                       |                                                                                                        |                                                           |
|-----------|------|--------|--------|--------|--------|-----------------------|--------------------------------------------------------------------------------------------------------|-----------------------------------------------------------|
| ILMN_264f | 1.09 | 8.66   | 11.8   | 5.6    | 12.9   | 48.9 Gm1077           | PREDICTED: gene model 1077, (NCBI) (Gm1077), mRNA.                                                     |                                                           |
| ILMN_122z | 1.11 | 2.35   | 164.1  | 114.5  | 181.4  | 269.3 Pik3cg          | phosphoinositide 3-kinase, catalytic, gamma polypeptide (Pik3cg), mRNA.                                |                                                           |
| ILMN_123f | 1.13 | -23.04 | 19.9   | -2.4   | 22.5   | 54.9 Hbb-b1           | hemoglobin, beta adult major chain (Hbb-b1), mRNA.                                                     |                                                           |
| ILMN_312i | 1.13 | 2.65   | 29.1   | 26.7   | 33.1   | 70.8 Lmna             | lamin A (Lmna), transcript variant 1, mRNA.                                                            |                                                           |
| ILMN_278g | 1.14 | 1.80   | 700.6  | 495.1  | 798.4  | 888.7 Itm2b           | integral membrane protein 2B (Itm2b), mRNA.                                                            |                                                           |
| ILMN_299f | 1.15 | 2.85   | 68.6   | 40.8   | 78.8   | 116.5 Obfc2a          | oligonucleotide/oligosaccharide-binding fold containing 2A (Obfc2a), mRNA.                             |                                                           |
| ILMN_272z | 1.16 | 2.18   | 146.9  | 122.8  | 170.1  | 267.5 Sirpa           | signal-regulatory protein alpha (Sirpa), mRNA.                                                         |                                                           |
| ILMN_254i | 1.18 | 2.30   | 196.1  | 182.5  | 231.3  | 419.9 LOC630420       | PREDICTED: similar to TRAV6D-5 (LOC630420), mRNA.                                                      |                                                           |
| ILMN_273f | 1.18 | 1.76   | 274.7  | 228.5  | 325.3  | 402.5 Cdc42ep3        | CDC42 effector protein (Rho GTPase binding) 3 (Cdc42ep3), mRNA.                                        |                                                           |
| ILMN_294d | 1.19 | 2.48   | 46.4   | 30.1   | 55.1   | 74.5 Akap7            | A kinase (PRKA) anchor protein 7 (Akap7), mRNA.                                                        |                                                           |
| ILMN_259f | 1.20 | 3.45   | 111.7  | 88.9   | 133.7  | 306.6 Mtt1            | metallothionein 1 (Mtt1), mRNA.                                                                        |                                                           |
| ILMN_285j | 1.20 | 2.71   | 79.3   | 59.4   | 95.2   | 161.1 Myadm           | myeloid-associated differentiation marker (Myadm), mRNA.                                               |                                                           |
| ILMN_275f | 1.20 | 1.77   | 370.1  | 371.1  | 445.0  | 658.6 LOC100044779    | PREDICTED: similar to prothymosin alpha (LOC100044779), misc RNA.                                      |                                                           |
| ILMN_265f | 1.21 | 1.96   | 131.8  | 103.0  | 159.0  | 202.2 Osbp13          | oxysterol binding protein-like 3 (Osbp13), mRNA.                                                       |                                                           |
| ILMN_261f | 1.22 | 2.05   | 18.1   | 74.8   | 22.0   | 153.5 Atf3            | activating transcription factor 3 (Atf3), mRNA.                                                        |                                                           |
| ILMN_273d | 1.22 | 2.00   | 287.5  | 257.8  | 350.5  | 516.5 Ramp1           | receptor (calcitonin) activity modifying protein 1 (Ramp1), mRNA.                                      |                                                           |
| ILMN_121z | 1.22 | 1.70   | 654.4  | 386.6  | 801.0  | 655.9 Itgae           | integrin, alpha E, epithelial-associated (Itgae), transcript variant 1, mRNA.                          |                                                           |
| ILMN_260g | 1.23 | 1.76   | 1339.4 | 828.3  | 1641.5 | 1459.1 LOC641240      | PREDICTED: similar to MHC class II antigen beta chain (LOC641240), mRNA.                               |                                                           |
| ILMN_273i | 1.23 | 1.68   | 367.4  | 375.7  | 452.0  | 631.3 Nrm             | nurim (nuclear envelope membrane protein) (Nrm), mRNA.                                                 |                                                           |
| ILMN_291f | 1.23 | 3.93   | 14.9   | 9.7    | 18.3   | 38.0                  | 1-Mar                                                                                                  | membrane-associated ring finger (C3HC4) 1 (March1), mRNA. |
| ILMN_241f | 1.24 | 2.87   | 64.2   | 52.7   | 79.7   | 151.3 mtDNA_ND4L      |                                                                                                        |                                                           |
| ILMN_284f | 1.24 | 1.77   | 190.1  | 141.2  | 236.2  | 249.4 Cmpk            | cytidylate kinase (Cmpk), mRNA.                                                                        |                                                           |
| ILMN_271f | 1.25 | 9.51   | 50.3   | 7.1    | 62.6   | 67.7 C1cq             | complement component 1, q subcomponent, C chain (C1cq), mRNA.                                          |                                                           |
| ILMN_278i | 1.27 | 1.88   | 120.8  | 79.4   | 153.1  | 149.2 Gm561           | gene model 561, (NCBI) (Gm561), mRNA.                                                                  |                                                           |
| ILMN_123i | 1.27 | 1.84   | 139.1  | 108.3  | 177.1  | 199.2 Pno1            | partner of NOB1 homolog (S. cerevisiae) (Pno1), mRNA.                                                  |                                                           |
| ILMN_267f | 1.28 | 2.94   | 101.8  | 70.6   | 130.0  | 207.6 Slc11a1         | solute carrier family 11 (proton-coupled divalent metal ion transporters), member 1 (Slc11a1), mRNA.   |                                                           |
| ILMN_277f | 1.28 | 1.97   | 77.5   | 52.5   | 99.1   | 103.2 Grb7            | growth factor receptor bound protein 7 (Grb7), mRNA.                                                   |                                                           |
| ILMN_276f | 1.28 | 2.02   | 71.5   | 53.7   | 91.4   | 108.6 Hnrpl1          | heterogeneous nuclear ribonucleoprotein L-like (Hnrpl1), mRNA.                                         |                                                           |
| ILMN_299g | 1.29 | 1.67   | 457.0  | 375.2  | 588.1  | 628.1 Pycr2           | pyrroline-5-carboxylate reductase family, member 2 (Pycr2), mRNA.                                      |                                                           |
| ILMN_125f | 1.29 | 1.66   | 157.7  | 140.1  | 203.0  | 232.9 Bcas2           | breast carcinoma amplified sequence 2 (Bcas2), mRNA.                                                   |                                                           |
| ILMN_275g | 1.29 | 1.62   | 413.4  | 250.2  | 533.7  | 404.9 Prc1            | protein regulator of cytokinesis 1 (Prc1), mRNA.                                                       |                                                           |
| ILMN_251i | 1.30 | 1.64   | 838.2  | 582.4  | 1086.0 | 956.0 Gng10           | guanine nucleotide binding protein (G protein), gamma 10 (Gng10), mRNA.                                |                                                           |
| ILMN_271c | 1.30 | 3.36   | 62.1   | 33.5   | 80.6   | 112.4 Crip2           | cysteine rich protein 2 (Crip2), mRNA.                                                                 |                                                           |
| ILMN_122j | 1.30 | 1.65   | 254.5  | 258.6  | 331.5  | 426.0 LOC636952       | PREDICTED: similar to Histone family member (his-71) (LOC636952), misc RNA.                            |                                                           |
| ILMN_121z | 1.30 | 2.84   | 110.9  | 115.4  | 144.5  | 327.5 Ifitm1          | interferon induced transmembrane protein 1 (Ifitm1), mRNA.                                             |                                                           |
| ILMN_273j | 1.30 | 3.11   | 129.7  | 71.0   | 169.1  | 220.9 S100a4          | S100 calcium binding protein A4 (S100a4), mRNA.                                                        |                                                           |
| ILMN_255f | 1.31 | 2.13   | 104.2  | 52.7   | 136.5  | 112.1 sc10002368.1_75 |                                                                                                        |                                                           |
| ILMN_284f | 1.31 | 1.71   | 285.9  | 221.3  | 375.2  | 377.6 Pts             | 6-pyruvoyl-tetrahydropterin synthase (Pts), mRNA.                                                      |                                                           |
| ILMN_292f | 1.31 | 1.72   | 163.2  | 199.1  | 214.4  | 342.0 Z310016C08Rik   | RIKEN cDNA Z310016C08Rik gene (Z310016C08Rik), mRNA.                                                   |                                                           |
| ILMN_265f | 1.32 | 1.88   | 106.2  | 91.1   | 140.1  | 171.5 Myo6            | myosin VI (Myo6), mRNA.                                                                                |                                                           |
| ILMN_274f | 1.33 | 1.54   | 656.6  | 660.0  | 870.2  | 1013.3 Ncf4           | neutrophil cytosolic factor 4 (Ncf4), mRNA.                                                            |                                                           |
| ILMN_124f | 1.33 | 1.74   | 296.7  | 247.7  | 394.5  | 432.1 Vps36           | vacuolar protein sorting 36 (yeast) (Vps36), mRNA.                                                     |                                                           |
| ILMN_274d | 1.34 | 1.69   | 133.7  | 160.8  | 179.4  | 271.3 Npc2            | Niemann Pick type C2 (Npc2), mRNA.                                                                     |                                                           |
| ILMN_279f | 1.35 | 4.69   | 30.1   | 17.8   | 40.7   | 83.6 S730469M10Rik    | RIKEN cDNA S730469M10Rik gene (S730469M10Rik), mRNA.                                                   |                                                           |
| ILMN_268f | 1.35 | 2.33   | 24.0   | 40.3   | 32.5   | 94.0 Nuak2            | NUAK family, SNF1-like kinase, 2 (Nuak2), mRNA.                                                        |                                                           |
| ILMN_121z | 1.36 | 1.99   | 51.3   | 42.5   | 69.7   | 84.5 Brrn1            |                                                                                                        |                                                           |
| ILMN_125f | 1.36 | 2.63   | 123.7  | 105.1  | 168.2  | 276.6 Lmna            | lamin A (Lmna), transcript variant 2, mRNA.                                                            |                                                           |
| ILMN_261f | 1.36 | 7.13   | 79.9   | 15.5   | 108.9  | 110.3 C1qb            | complement component 1, q subcomponent, beta polypeptide (C1qb), mRNA.                                 |                                                           |
| ILMN_299g | 1.36 | 1.47   | 1378.8 | 1209.6 | 1881.9 | 1774.5 Spcs1          | signal peptidase complex subunit 1 homolog (S. cerevisiae) (Spcs1), mRNA.                              |                                                           |
| ILMN_268f | 1.37 | 1.54   | 526.7  | 464.6  | 720.1  | 715.2 Anxa5           | annexin A5 (Anxa5), mRNA.                                                                              |                                                           |
| ILMN_260g | 1.37 | 1.85   | 168.5  | 173.6  | 230.5  | 322.0 Prickle3        | prickle homolog 3 (Drosophila) (Prickle3), mRNA.                                                       |                                                           |
| ILMN_247f | 1.37 | 4.05   | 15.0   | 8.1    | 20.5   | 33.0 1110062M06Rik    |                                                                                                        |                                                           |
| ILMN_121z | 1.38 | 1.62   | 194.4  | 202.6  | 267.4  | 327.5 Tax1bp3         | Tax1 (human T-cell leukemia virus type I) binding protein 3 (Tax1bp3), mRNA.                           |                                                           |
| ILMN_296f | 1.38 | 1.76   | 145.0  | 154.3  | 199.9  | 270.9 Cyb5            | cytochrome b-5 (Cyb5), mRNA.                                                                           |                                                           |
| ILMN_268f | 1.38 | 1.55   | 236.8  | 240.7  | 326.5  | 372.4 Arl8a           | ADP-ribosylation factor-like 8A (Arl8a), mRNA.                                                         |                                                           |
| ILMN_122z | 1.38 | 1.59   | 368.9  | 371.8  | 508.8  | 591.8 LOC675899       | PREDICTED: similar to H2A histone family, member Z (LOC675899), mRNA.                                  |                                                           |
| ILMN_122z | 1.38 | 1.90   | 137.0  | 146.5  | 189.3  | 278.6 Cdc43           | cell division cycle associated 3 (Cdc43), mRNA.                                                        |                                                           |
| ILMN_266f | 1.38 | 2.15   | 30.3   | 32.5   | 41.9   | 69.7 P2ry6            | pyrimidineric receptor P2Y, G-protein coupled, 6 (P2ry6), mRNA.                                        |                                                           |
| ILMN_290f | 1.39 | 1.54   | 212.8  | 188.6  | 295.6  | 289.7 Iqgap2          | IQ motif containing GTPase activating protein 2 (Iqgap2), mRNA.                                        |                                                           |
| ILMN_277f | 1.39 | 1.66   | 824.6  | 610.4  | 1147.4 | 1015.9 Glipr2         |                                                                                                        |                                                           |
| ILMN_122z | 1.39 | 1.99   | 120.3  | 101.6  | 167.5  | 202.4 Z300009A05Rik   | PREDICTED: RIKEN cDNA Z300009A05Rik gene, transcript variant 3 (Z300009A05Rik), mRNA.                  |                                                           |
| ILMN_262z | 1.39 | 2.52   | 272.2  | 132.6  | 379.4  | 333.8 Soc2            | suppressor of cytokine signaling 2 (Soc2), mRNA.                                                       |                                                           |
| ILMN_311d | 1.39 | 1.70   | 74.4   | 69.7   | 103.8  | 118.6 Pard6a          | par-6 (partitioning defective 6,) homolog alpha (C. elegans) (Pard6a), transcript variant 3, mRNA.     |                                                           |
| ILMN_274d | 1.40 | 6.57   | 211.7  | 32.3   | 295.8  | 212.3 Slc40a1         | solute carrier family 40 (iron-regulated transporter), member 1 (Slc40a1), mRNA.                       |                                                           |
| ILMN_273d | 1.40 | 1.60   | 346.6  | 293.7  | 485.7  | 470.5 1200003C05Rik   | RIKEN cDNA 1200003C05Rik gene (1200003C05Rik), mRNA.                                                   |                                                           |
| ILMN_262z | 1.40 | 1.46   | 340.2  | 320.9  | 477.4  | 469.9 Cpm             | PREDICTED: carboxypeptidase M (Cpm), mRNA.                                                             |                                                           |
| ILMN_277j | 1.41 | 2.83   | 58.8   | 37.6   | 82.7   | 106.5 Osbp15          |                                                                                                        |                                                           |
| ILMN_277d | 1.41 | 1.97   | 48.9   | 37.1   | 68.8   | 72.8 Lamc1            | laminin, gamma 1 (Lamc1), mRNA.                                                                        |                                                           |
| ILMN_287z | 1.41 | 1.59   | 345.8  | 325.0  | 486.9  | 516.8 Mdh2            | malate dehydrogenase 2, NAD (mitochondrial) (Mdh2), nuclear gene encoding mitochondrial protein, mRNA. |                                                           |
| ILMN_253f | 1.42 | -74.41 | 5.1    | -0.4   | 7.3    | 30.9 Hspa1b           | heat shock protein 1B (Hspa1b), mRNA.                                                                  |                                                           |
| ILMN_251i | 1.42 | 1.49   | 499.2  | 371.0  | 708.8  | 551.4 Tnfrsf25        | tumor necrosis factor receptor superfamily, member 25 (Tnfrsf25), mRNA.                                |                                                           |
| ILMN_275f | 1.43 | 1.49   | 225.8  | 197.9  | 323.0  | 295.1 2410008K03Rik   | RIKEN cDNA 2410008K03Rik gene (2410008K03Rik), mRNA.                                                   |                                                           |
| ILMN_275f | 1.43 | 2.81   | 177.5  | 109.9  | 254.0  | 309.4 Ffar2           | free fatty acid receptor 2 (Ffar2), mRNA.                                                              |                                                           |
| ILMN_281i | 1.43 | 2.15   | 46.4   | 43.7   | 66.5   | 94.1 Tspan17          | tetraspanin 17 (Tspan17), mRNA.                                                                        |                                                           |
| ILMN_122z | 1.44 | 1.55   | 193.0  | 178.4  | 277.0  | 277.4 2410015N17Rik   | RIKEN cDNA 2410015N17Rik gene (2410015N17Rik), mRNA.                                                   |                                                           |
| ILMN_122z | 1.44 | 2.33   | 146.8  | 123.4  | 210.8  | 287.5 Trat1           | T cell receptor associated transmembrane adaptor 1 (Trat1), mRNA.                                      |                                                           |
| ILMN_121d | 1.44 | 1.67   | 269.5  | 197.7  | 387.1  | 331.2 sc10002368.1_75 |                                                                                                        |                                                           |
| ILMN_259d | 1.44 | 1.93   | 123.8  | 110.9  | 178.0  | 213.8 Adam17          | a disintegrin and metallopeptidase domain 17 (Adam17), mRNA.                                           |                                                           |
| ILMN_121z | 1.44 | 2.74   | 17.1   | 18.9   | 24.6   | 51.9 Tusc1            | tumor suppressor candidate 1 (Tusc1), mRNA.                                                            |                                                           |
| ILMN_121z | 1.44 | 1.74   | 66.5   | 66.0   | 96.0   | 114.6 EG665509        | PREDICTED: predicted gene, EG665509 (EG665509), mRNA.                                                  |                                                           |
| ILMN_316j | 1.44 | 4.57   | 15.5   | 10.1   | 22.4   | 46.1 Clec4a3          | C-type lectin domain family 4, member a3 (Clec4a3), mRNA.                                              |                                                           |
| ILMN_263z | 1.44 | 1.52   | 494.6  | 462.0  | 714.6  | 702.8 Med28           | mediator of RNA polymerase II transcription, subunit 28 homolog (yeast) (Med28), mRNA.                 |                                                           |
| ILMN_300f | 1.45 | 1.50   | 257.5  | 257.0  | 372.2  | 385.5 1110038D17Rik   | RIKEN cDNA 1110038D17Rik gene (1110038D17Rik), mRNA.                                                   |                                                           |
| ILMN_124i | 1.45 | 1.52   | 176.7  | 159.1  | 255.7  | 241.5 Rdh11           |                                                                                                        |                                                           |
| ILMN_260j | 1.45 | 1.46   | 453.5  | 418.3  | 656.3  | 612.4 Mrpl52          | mitochondrial ribosomal protein L52 (Mrpl52), nuclear gene encoding mitochondrial protein, mRNA.       |                                                           |
| ILMN_121z | 1.45 | 1.72   | 426.9  | 355.4  | 618.6  | 610.2 Glipr1          | GLI pathogenesis-related 1 (glioma) (Glipr1), mRNA.                                                    |                                                           |
| ILMN_277z | 1.45 | 1.74   | 125.5  | 159.3  | 181.9  | 276.8 Fosb            | FBJ osteosarcoma oncogene B (Fosb), mRNA.                                                              |                                                           |
| ILMN_245d | 1.45 | 1.49   | 224.9  | 198.8  | 326.3  | 297.1 Tusc4           | tumor suppressor candidate 4 (Tusc4), mRNA.                                                            |                                                           |
| ILMN_289z | 1.46 | 2.09   | 52.8   | 48.8   | 77.0   | 102.1 Eif4e3          | eukaryotic translation initiation factor 4E member 3 (Eif4e3), mRNA.                                   |                                                           |
| ILMN_277z | 1.46 | 4.85   | 76.6   | 19.8   | 112.0  | 96.1 Vcam1            | vascular cell adhesion molecule 1 (Vcam1), mRNA.                                                       |                                                           |
| ILMN_123z | 1.46 | 1.98   | 57.2   | 38.3   | 83.6   | 75.9 Rbbp4            |                                                                                                        |                                                           |
| ILMN_284f | 1.46 | 1.56   | 325.2  | 273.1  | 476.0  | 426.7 Tmem14c         | transmembrane protein 14C (Tmem14c), mRNA.                                                             |                                                           |
| ILMN_291c | 1.46 | 1.56   | 154.2  | 137.4  | 225.8  | 214.0 Aco10           | acyl-CoA thioesterase 10 (Aco10), mRNA.                                                                |                                                           |
| ILMN_285f | 1.46 | 1.84   | 193.6  | 207.2  | 283.5  | 381.0 Hist11c         | histone cluster 1, H1c (Hist11c), mRNA.                                                                |                                                           |
| ILMN_246f | 1.47 | 7.63   | 10.9   | 5.2    | 16.0   | 39.5 Z700050C19Rik    |                                                                                                        |                                                           |
| ILMN_262z | 1.47 | 1.60   | 298.1  | 238.8  | 437.3  | 382.2 Cbx3            |                                                                                                        |                                                           |
| ILMN_252j | 1.47 | 1.83   | 70.1   | 48.4   | 102.8  | 88.8 2610030H06Rik    |                                                                                                        |                                                           |
| ILMN_121z | 1.47 | 1.56   | 845.6  | 680.6  | 1241.6 | 1062.8 Il18r1         | interleukin 18 receptor 1 (Il18r1), mRNA.                                                              |                                                           |
| ILMN_284d | 1.47 | 1.97   | 54.1   | 37.9   | 79.5   | 74.8 Polr3k           | polymerase (RNA) III (DNA directed) polypeptide K (Polr3k), mRNA.                                      |                                                           |
| ILMN_121z | 1.47 | 1.70   | 76.0   | 64.5   | 112.1  | 109.3 2810439F02Rik   | RIKEN cDNA 2810439F02Rik gene (2810439F02Rik), mRNA.                                                   |                                                           |
| ILMN_125f | 1.49 | 2.11   | 46.7   | 36.1   | 69.4   | 75.9 Gcnt1            | glucosaminyl (N-acetyl) transferase 1, core 2 (Gcnt1), mRNA.                                           |                                                           |
| ILMN_277z | 1.49 | 1.79   | 1215.9 | 786.7  | 1806.9 | 1410.2 Glr1c          |                                                                                                        |                                                           |
| ILMN_314d | 1.49 | 1.73   | 87.2   | 70.9   | 129.7  | 122.4 Lysmd1          | LysM, putative peptidoglycan-binding, domain containing 1 (Lysmd1), mRNA.                              |                                                           |
| ILMN_123f | 1.49 | 2.27   | 25.9   | 23.3   | 38.6   | 52.8 LOC245892        |                                                                                                        |                                                           |
| ILMN_125f | 1.49 | 3.13   | 143.7  | 65.9   | 214.4  | 206.4 Slpi            | secretory leukocyte peptidase inhibitor (Slpi), mRNA.                                                  |                                                           |
| ILMN_121z | 1.49 | 1.49   | 228.3  | 227.8  | 341.0  | 340.5 Iqgap2          | IQ motif containing GTPase activating protein 2 (Iqgap2), mRNA.                                        |                                                           |
| ILMN_296j | 1.49 | 1.47   | 333.0  | 281.0  | 497.7  | 413.3 Them2           | thioesterase superfamily member 2 (Them2), mRNA.                                                       |                                                           |

|           |      |       |        |        |        |                      |                                                                                                                                 |
|-----------|------|-------|--------|--------|--------|----------------------|---------------------------------------------------------------------------------------------------------------------------------|
| ILMN_3107 | 1.50 | 1.48  | 297.5  | 295.4  | 446.3  | 436.1 Anxa11         | annexin A11 (Anxa11), mRNA.                                                                                                     |
| ILMN_2710 | 1.50 | 2.84  | 25.3   | 14.5   | 38.0   | 41.1 Csf1r           | colony stimulating factor 1 receptor (Csf1r), mRNA.                                                                             |
| ILMN_1227 | 1.51 | 2.08  | 46.7   | 27.7   | 70.3   | 57.5 Tnfsf13b        |                                                                                                                                 |
| ILMN_2757 | 1.51 | 4.91  | 9.7    | 7.4    | 14.6   | 36.6 Kndc1           | kinase non-catalytic C-lobe domain (KIND) containing 1 (Kndc1), mRNA.                                                           |
| ILMN_1237 | 1.51 | 1.80  | 199.1  | 196.9  | 299.9  | 354.5 Slc25a19       | solute carrier family 25 (mitochondrial thiamine pyrophosphate carrier), member 19 (Slc25a19), nuclear gene encoding mitoc      |
| ILMN_2944 | 1.51 | 1.32  | 1077.2 | 965.9  | 1628.7 | 1279.8 Cope          | coatamer protein complex, subunit epsilon (Cope), mRNA.                                                                         |
| ILMN_2731 | 1.51 | 2.37  | 41.2   | 36.7   | 62.4   | 87.0 Brp17           |                                                                                                                                 |
| ILMN_2960 | 1.52 | 1.95  | 36.5   | 41.7   | 55.3   | 81.4 Agpat4          | 1-acylglycerol-3-phosphate O-acyltransferase 4 (lysophosphatidic acid acyltransferase, delta) (Agpat4), mRNA.                   |
| ILMN_2424 | 1.52 | 1.59  | 113.2  | 105.0  | 171.9  | 167.4 Cep170         | centrosomal protein 170 (Cep170), mRNA.                                                                                         |
| ILMN_2740 | 1.53 | 1.46  | 121.1  | 121.8  | 184.7  | 178.0 Idh3a          | isocitrate dehydrogenase 3 (NAD+) alpha (Idh3a), nuclear gene encoding mitochondrial protein, mRNA.                             |
| ILMN_2777 | 1.54 | 1.73  | 53.2   | 51.8   | 81.6   | 89.7 C730025P13Rik   | RIKEN cDNA C730025P13 gene (C730025P13Rik), mRNA.                                                                               |
| ILMN_1237 | 1.54 | 1.86  | 218.3  | 169.3  | 335.5  | 314.5 EG665369       | PREDICTED: predicted gene, EG665369 (EG665369), mRNA.                                                                           |
| ILMN_2777 | 1.54 | 1.57  | 133.2  | 120.5  | 204.7  | 188.8 Zbtb32         | zinc finger and BTB domain containing 32 (Zbtb32), mRNA.                                                                        |
| ILMN_1257 | 1.54 | 2.31  | 99.8   | 84.2   | 153.6  | 194.1 Marcks         | myristoylated alanine rich protein kinase C substrate (Marcks), mRNA.                                                           |
| ILMN_1257 | 1.55 | 1.69  | 671.8  | 482.2  | 1042.1 | 814.1 A430093F15Rik  | PREDICTED: RIKEN cDNA A430093F15 gene (A430093F15Rik), misc RNA.                                                                |
| ILMN_2750 | 1.55 | 2.01  | 1018.0 | 1348.9 | 1582.9 | 2713.6 Fos           | FBJ osteosarcoma oncogene (Fos), mRNA.                                                                                          |
| ILMN_2637 | 1.56 | 1.64  | 78.2   | 78.2   | 122.1  | 128.0 Cdc2           | cell division cycle associated 2 (Cdc2), mRNA.                                                                                  |
| ILMN_1217 | 1.56 | 2.37  | 71.8   | 30.0   | 112.4  | 71.0 LOC209033       |                                                                                                                                 |
| ILMN_1227 | 1.57 | 1.50  | 144.0  | 164.9  | 225.4  | 247.5 1700013A01Rik  |                                                                                                                                 |
| ILMN_2940 | 1.57 | 2.05  | 90.4   | 58.5   | 141.6  | 119.6 GArn1          | GTPase activating RANGAP domain-like 4 (Garn1), mRNA.                                                                           |
| ILMN_1230 | 1.57 | 3.67  | 13.6   | 13.9   | 21.4   | 51.2 Clec4a1         | C-type lectin domain family 4, member a1 (Clec4a1), mRNA.                                                                       |
| ILMN_2677 | 1.58 | 2.06  | 44.0   | 50.6   | 69.3   | 104.1 Ciita          | class II transactivator (Ciita), mRNA.                                                                                          |
| ILMN_1227 | 1.58 | 12.06 | 9.2    | 3.8    | 14.5   | 46.3 Slc4a1          | solute carrier family 4 (anion exchanger), member 1 (Slc4a1), mRNA.                                                             |
| ILMN_2684 | 1.59 | 1.38  | 197.6  | 264.2  | 313.3  | 364.2 4930431B09Rik  | PREDICTED: RIKEN cDNA 4930431B09 gene (4930431B09Rik), misc RNA.                                                                |
| ILMN_3067 | 1.59 | 1.42  | 191.6  | 206.8  | 304.3  | 294.5 4930572J05Rik  | RIKEN cDNA 4930572J05 gene (4930572J05Rik), mRNA.                                                                               |
| ILMN_2714 | 1.59 | 2.21  | 29.0   | 27.3   | 46.0   | 60.4 Rrm2            |                                                                                                                                 |
| ILMN_2857 | 1.59 | 1.81  | 145.8  | 111.9  | 231.9  | 202.2 Gnlda1         | glucosamine-6-phosphate deaminase 1 (Gnlda1), mRNA.                                                                             |
| ILMN_1244 | 1.60 | 2.04  | 48.4   | 31.0   | 77.3   | 63.3 Crmp1           | collapsin response mediator protein 1 (Crmp1), mRNA.                                                                            |
| ILMN_3034 | 1.60 | 1.98  | 85.1   | 96.9   | 135.9  | 191.6 170004717Rik1  | RIKEN cDNA 170004717 gene 1 (170004717Rik1), mRNA.                                                                              |
| ILMN_2597 | 1.60 | 2.72  | 65.2   | 57.3   | 104.2  | 155.7 Pqlc1          | PQ loop repeat containing 1 (Pqlc1), mRNA.                                                                                      |
| ILMN_2867 | 1.60 | 1.82  | 167.7  | 203.7  | 268.4  | 370.7 Alox5ap        | arachidonate 5-lipoxygenase activating protein (Alox5ap), mRNA.                                                                 |
| ILMN_2597 | 1.60 | 5.73  | 16.8   | 11.0   | 26.8   | 63.3 Slamf8          |                                                                                                                                 |
| ILMN_2647 | 1.61 | 1.98  | 103.7  | 83.4   | 166.7  | 164.7 Arrdc4         | arrestin domain containing 4 (Arrdc4), transcript variant 1, mRNA.                                                              |
| ILMN_2517 | 1.61 | 1.46  | 110.9  | 114.6  | 178.3  | 167.9 LOC100047936   | PREDICTED: similar to sortilin-related receptor, LDLR class A repeats-containing (LOC100047936), misc RNA.                      |
| ILMN_2734 | 1.61 | 2.29  | 353.4  | 357.9  | 569.0  | 818.2 H2-Aa          | histocompatibility 2, class II antigen A, alpha (H2-Aa), mRNA.                                                                  |
| ILMN_1237 | 1.61 | 2.74  | 20.4   | 11.0   | 32.9   | 30.3 LOC635601       | PREDICTED: similar to Ig kappa chain V-II region RPM1 6410 precursor (LOC635601), mRNA.                                         |
| ILMN_1220 | 1.61 | 1.26  | 379.6  | 376.0  | 612.5  | 472.0 Ebi2           |                                                                                                                                 |
| ILMN_2607 | 1.62 | 2.68  | 20.1   | 16.7   | 32.5   | 44.8 F730031O20Rik   |                                                                                                                                 |
| ILMN_1230 | 1.62 | 2.81  | 17.4   | 16.6   | 28.1   | 46.6 A930004K21Rik   |                                                                                                                                 |
| ILMN_2967 | 1.62 | 2.09  | 97.8   | 71.8   | 158.2  | 150.4 Nqo2           | NAD(P)H dehydrogenase, quinone 2 (Nqo2), mRNA.                                                                                  |
| ILMN_2687 | 1.62 | 1.51  | 89.3   | 77.2   | 144.5  | 116.4 AW555464       |                                                                                                                                 |
| ILMN_2554 | 1.62 | 1.73  | 47.1   | 36.4   | 76.4   | 63.0 Tmem65          | transmembrane protein 65 (Tmem65), mRNA.                                                                                        |
| ILMN_2627 | 1.63 | 1.50  | 100.9  | 91.3   | 164.2  | 137.0 Dexi           | dexamethasone-induced transcript (Dexi), mRNA.                                                                                  |
| ILMN_2687 | 1.63 | 2.51  | 45.4   | 40.8   | 73.8   | 102.5 9130404D14Rik  | RIKEN cDNA 9130404D14 gene (9130404D14Rik), mRNA.                                                                               |
| ILMN_1224 | 1.63 | 1.31  | 283.7  | 312.6  | 461.7  | 409.8 5730593F17Rik  | RIKEN cDNA 5730593F17 gene (5730593F17Rik), mRNA.                                                                               |
| ILMN_2717 | 1.63 | 1.74  | 868.0  | 881.4  | 1414.4 | 1529.9 Cish          | cytokine inducible SH2-containing protein (Cish), mRNA.                                                                         |
| ILMN_2737 | 1.63 | 1.77  | 62.1   | 38.7   | 101.2  | 68.4 Fbxo27          | F-box protein 27 (Fbxo27), mRNA.                                                                                                |
| ILMN_1227 | 1.64 | 2.35  | 81.7   | 55.9   | 133.8  | 131.4 Inpp4b         |                                                                                                                                 |
| ILMN_1227 | 1.64 | 1.73  | 529.9  | 552.0  | 868.6  | 956.0 Cfp            | complement factor properdin (Cfp), mRNA.                                                                                        |
| ILMN_2677 | 1.64 | 1.64  | 71.7   | 61.5   | 117.7  | 101.0 Eif4ebp1       | eukaryotic translation initiation factor 4E binding protein 1 (Eif4ebp1), mRNA.                                                 |
| ILMN_2827 | 1.64 | 2.70  | 36.8   | 32.5   | 60.4   | 87.5 Plxdc1          | plexin domain containing 1 (Plxdc1), mRNA.                                                                                      |
| ILMN_2717 | 1.65 | 5.61  | 69.1   | 15.4   | 113.8  | 86.6 Fcna            | ficolin A (Fcna), mRNA.                                                                                                         |
| ILMN_1227 | 1.65 | 1.22  | 409.5  | 450.2  | 675.9  | 550.1 Kctd2          | potassium channel tetramerisation domain containing 2 (Kctd2), mRNA.                                                            |
| ILMN_2984 | 1.66 | 1.44  | 2008.9 | 2110.4 | 3334.2 | 3040.5 Emp3          | epithelial membrane protein 3 (Emp3), mRNA.                                                                                     |
| ILMN_1240 | 1.66 | 1.95  | 121.3  | 94.1   | 201.6  | 183.0 Stard4         | STAR-related lipid transfer (START) domain containing 4 (Stard4), mRNA.                                                         |
| ILMN_1238 | 1.66 | 2.36  | 29.9   | 21.1   | 49.8   | 49.8 Rom1            | rod outer segment membrane protein 1 (Rom1), mRNA.                                                                              |
| ILMN_2677 | 1.67 | 1.49  | 265.7  | 264.7  | 443.5  | 393.7 Prsm8          | proteasome (prosome, macropain) 26S subunit, non-ATPase, 8 (Prsm8), mRNA. XM_001002011                                          |
| ILMN_1247 | 1.67 | 1.90  | 162.9  | 140.3  | 272.1  | 266.2 Cd74           | CD74 antigen (invariant polypeptide of major histocompatibility complex, class II antigen-associated) (Cd74), transcript varian |
| ILMN_2707 | 1.67 | 1.67  | 100.4  | 94.7   | 167.9  | 158.5 Ccng1          | cyclin G1 (Ccng1), mRNA.                                                                                                        |
| ILMN_2720 | 1.67 | 2.00  | 32.6   | 28.2   | 54.6   | 56.4 Rbm47           | RNA binding motif protein 47 (Rbm47), mRNA.                                                                                     |
| ILMN_2827 | 1.68 | 1.32  | 179.6  | 190.8  | 301.5  | 252.3 Taf12          | TAF12 RNA polymerase II, TATA box binding protein (TBP)-associated factor (Taf12), mRNA.                                        |
| ILMN_2764 | 1.68 | 1.52  | 80.6   | 86.4   | 135.4  | 131.5 1810009N02Rik  | RIKEN cDNA 1810009N02 gene (1810009N02Rik), mRNA.                                                                               |
| ILMN_1221 | 1.68 | 1.32  | 220.3  | 199.1  | 371.1  | 262.3 Sec11c         | SEC11 homolog C (S. cerevisiae) (Sec11c), mRNA.                                                                                 |
| ILMN_1257 | 1.69 | 1.36  | 167.8  | 193.8  | 283.7  | 263.1 Ywhag          | tyrosine 3-monoxygenase/tryptophan 5-monoxygenase activation protein, gamma polypeptide (Ywhag), mRNA.                          |
| ILMN_2854 | 1.69 | 1.45  | 159.3  | 169.0  | 269.3  | 245.2 D15Mgi27       | DNA Segment, Chr 15, Mouse Genome Informatics 27 (D15Mgi27), mRNA.                                                              |
| ILMN_2797 | 1.69 | 1.46  | 1164.2 | 660.7  | 1972.1 | 961.6 P2ry5          | purinergic receptor P2Y, G-protein coupled, 5 (P2ry5), mRNA.                                                                    |
| ILMN_1221 | 1.70 | 3.42  | 99.2   | 61.9   | 168.3  | 211.7 Fcgrt          |                                                                                                                                 |
| ILMN_3147 | 1.70 | 4.82  | 8.5    | 5.8    | 14.5   | 28.1 Klri1           | killer cell lectin-like receptor family I member 1 (Klri1), mRNA.                                                               |
| ILMN_2757 | 1.70 | 2.44  | 23.3   | 28.9   | 39.7   | 70.6 Avp1            | arginine vasopressin-induced 1 (Avp1), mRNA.                                                                                    |
| ILMN_2847 | 1.71 | 1.36  | 482.0  | 624.4  | 822.7  | 850.3 Kihdc2         | kelch domain containing 2 (Kihdc2), mRNA.                                                                                       |
| ILMN_1237 | 1.71 | 1.42  | 247.1  | 281.3  | 422.5  | 399.0 EG626367       | PREDICTED: predicted gene, EG626367 (EG626367), misc RNA.                                                                       |
| ILMN_2957 | 1.71 | 1.38  | 67.3   | 77.9   | 115.1  | 107.1 Ufsp2          | UFM1-specific peptidase 2 (Ufsp2), mRNA.                                                                                        |
| ILMN_2957 | 1.71 | 2.05  | 133.6  | 106.2  | 229.0  | 218.2 1110001J03Rik  | RIKEN cDNA 1110001J03 gene (1110001J03Rik), mRNA.                                                                               |
| ILMN_2667 | 1.72 | 2.23  | 29.9   | 19.4   | 51.5   | 43.2 Ocel1           | occludin/ELL domain containing 1 (Ocel1), mRNA.                                                                                 |
| ILMN_1247 | 1.72 | 1.37  | 238.4  | 227.0  | 409.9  | 312.0 Slc35b2        | solute carrier family 35, member B2 (Slc35b2), mRNA.                                                                            |
| ILMN_1247 | 1.72 | 1.54  | 56.1   | 68.5   | 96.5   | 105.2 Kit            |                                                                                                                                 |
| ILMN_2420 | 1.73 | 2.13  | 26.6   | 19.1   | 45.9   | 40.5 6430511F03      |                                                                                                                                 |
| ILMN_2727 | 1.73 | 1.59  | 213.9  | 158.1  | 369.8  | 251.1 Lsm10          | U7 snRNP-specific Sm-like protein LSM10 (Lsm10), mRNA.                                                                          |
| ILMN_1217 | 1.73 | 2.05  | 37.5   | 29.0   | 65.0   | 159.7 Med31          | mediator of RNA polymerase II transcription, subunit 31 homolog (yeast) (Med31), mRNA.                                          |
| ILMN_2624 | 1.73 | 1.50  | 104.6  | 87.3   | 181.3  | 130.8 Akap12         | A kinase (PRKA) anchor protein (gravin) 12 (Akap12), mRNA.                                                                      |
| ILMN_2707 | 1.73 | 2.55  | 26.6   | 18.3   | 46.1   | 46.7 4931426K16Rik   |                                                                                                                                 |
| ILMN_2644 | 1.74 | 2.38  | 24.0   | 20.9   | 41.6   | 49.7 2810032E02Rik   | PREDICTED: RIKEN cDNA 2810032E02 gene (2810032E02Rik), mRNA.                                                                    |
| ILMN_2524 | 1.74 | 5.91  | 9.2    | 6.9    | 15.9   | 40.5 Ear2            | eosinophil-associated, ribonuclease A family, member 2 (Ear2), mRNA.                                                            |
| ILMN_2977 | 1.74 | 1.72  | 49.9   | 44.0   | 87.0   | 75.7 Rnf6            | ring finger protein (C3H2C3 type) 6 (Rnf6), mRNA.                                                                               |
| ILMN_2737 | 1.75 | 2.08  | 98.1   | 85.2   | 171.6  | 177.5 Il4i1          | interleukin 4 induced 1 (Il4i1), mRNA.                                                                                          |
| ILMN_1257 | 1.75 | 1.76  | 121.8  | 86.2   | 213.0  | 151.9 Kcnk6          | potassium inwardly-rectifying channel, subfamily K, member 6 (Kcnk6), mRNA.                                                     |
| ILMN_2987 | 1.75 | 1.77  | 141.7  | 99.4   | 247.9  | 176.0 Kcnk5          | potassium channel, subfamily K, member 5 (Kcnk5), mRNA.                                                                         |
| ILMN_2422 | 1.75 | 1.63  | 66.5   | 42.2   | 116.6  | 68.9 LOC100040353    | PREDICTED: similar to splicing coactivator subunit SRm300 (LOC100040353), mRNA.                                                 |
| ILMN_3047 | 1.75 | 1.80  | 34.6   | 27.0   | 60.6   | 48.8 Kcnk6           | potassium inwardly-rectifying channel, subfamily K, member 6 (Kcnk6), mRNA.                                                     |
| ILMN_2697 | 1.76 | 3.86  | 21.1   | 7.5    | 37.0   | 29.1 Hebp1           | heme binding protein 1 (Hebp1), mRNA.                                                                                           |
| ILMN_2767 | 1.77 | 1.33  | 91.5   | 98.7   | 161.6  | 131.3 Gmcs           | GDP-mannose 4, 6-dehydratase (Gmcs), mRNA.                                                                                      |
| ILMN_1247 | 1.77 | 1.54  | 67.2   | 69.1   | 118.6  | 106.7 Ppap2c         | phosphatidic acid phosphatase type 2c (Ppap2c), mRNA.                                                                           |
| ILMN_2847 | 1.77 | 3.82  | 12.6   | 7.5    | 22.2   | 28.7 Ecdh2           | enoyl Coenzyme A hydratase domain containing 2 (Ecdh2), mRNA.                                                                   |
| ILMN_2617 | 1.78 | 1.36  | 183.3  | 155.0  | 325.5  | 211.5 Kctd17         | potassium channel tetramerisation domain containing 17 (Kctd17), mRNA.                                                          |
| ILMN_1237 | 1.78 | 1.22  | 199.9  | 218.3  | 355.6  | 266.4 4930504E06Rik  | RIKEN cDNA 4930504E06 gene (4930504E06Rik), mRNA.                                                                               |
| ILMN_2727 | 1.78 | 2.53  | 22.9   | 25.0   | 40.8   | 63.2 Havcr2          | hepatitis A virus cellular receptor 2 (Havcr2), mRNA.                                                                           |
| ILMN_2960 | 1.78 | 1.63  | 67.5   | 69.0   | 84.8   | 112.5 Cyp27a1        | cytochrome P450, family 27, subfamily a, polypeptide 1 (Cyp27a1), mRNA.                                                         |
| ILMN_1257 | 1.78 | 2.13  | 27.3   | 20.2   | 48.7   | 43.1 1810014F10Rik   | RIKEN cDNA 1810014F10 gene (1810014F10Rik), mRNA.                                                                               |
| ILMN_2607 | 1.79 | 1.38  | 123.0  | 162.6  | 219.9  | 223.8 Cncd1          |                                                                                                                                 |
| ILMN_2837 | 1.79 | 1.71  | 204.1  | 146.6  | 365.4  | 251.4 E2f2           | E2F transcription factor 2 (E2f2), mRNA.                                                                                        |
| ILMN_2587 | 1.80 | 2.36  | 42.7   | 36.6   | 76.6   | 86.5 E030040J22Rik   |                                                                                                                                 |
| ILMN_2517 | 1.80 | 1.46  | 70.7   | 73.3   | 127.2  | 107.3 scl0001118.1_0 |                                                                                                                                 |
| ILMN_2787 | 1.80 | 2.13  | 158.1  | 139.5  | 284.5  | 297.8 Napsa          | napsin A aspartic peptidase (Napsa), mRNA.                                                                                      |
| ILMN_1217 | 1.80 | 1.77  | 558.8  | 599.9  | 1005.6 | 1059.9 Emb           | embigin (Emb), mRNA.                                                                                                            |
| ILMN_2677 | 1.81 | 2.44  | 39.2   | 42.9   | 71.0   | 104.8 Gpr146         |                                                                                                                                 |
| ILMN_1247 | 1.81 | 1.34  | 98.9   | 112.5  | 179.2  | 150.5 LOC436541      | PREDICTED: similar to TRAV9-1 (LOC436541), misc RNA.                                                                            |
| ILMN_2957 | 1.81 | 4.00  | 29.9   | 14.8   | 54.2   | 59.2 Kremen2         | kingle containing transmembrane protein 2 (Kremen2), mRNA.                                                                      |

|           |      |       |        |        |        |                     |                                                                                                              |
|-----------|------|-------|--------|--------|--------|---------------------|--------------------------------------------------------------------------------------------------------------|
| ILMN_2854 | 1.82 | 6.65  | 38.7   | 11.6   | 70.5   | 77.2 Spic           | Spi-C transcription factor (Spi-1/PU.1 related) (Spic), mRNA.                                                |
| ILMN_2466 | 1.83 | 4.67  | 12.1   | 7.9    | 22.2   | 36.8 7330410H16Rik  |                                                                                                              |
| ILMN_1215 | 1.83 | 1.87  | 66.6   | 68.2   | 121.9  | 127.7 Pcpn          | PEST proteolytic signal containing nuclear protein (Pcpn), mRNA.                                             |
| ILMN_1227 | 1.83 | 2.11  | 99.0   | 75.9   | 181.2  | 160.1 Acot11        | acyl-CoA thioesterase 11 (Acot11), mRNA.                                                                     |
| ILMN_2688 | 1.84 | 1.92  | 285.7  | 344.1  | 524.8  | 659.4 Tmem109       | transmembrane protein 109 (Tmem109), mRNA.                                                                   |
| ILMN_3111 | 1.85 | 2.49  | 30.0   | 34.4   | 55.5   | 85.6 Cd40           | CD40 antigen (Cd40), transcript variant 5, mRNA.                                                             |
| ILMN_2604 | 1.85 | 6.58  | 7.3    | 5.9    | 13.6   | 39.0 LOC635815      | PREDICTED: similar to Ig kappa chain V-V region L6 precursor (LOC635815), mRNA.                              |
| ILMN_2598 | 1.85 | 1.41  | 48.6   | 49.6   | 90.1   | 70.2 Chst10         | carbohydrate sulfotransferase 10 (Chst10), mRNA.                                                             |
| ILMN_2637 | 1.86 | 1.25  | 133.1  | 139.2  | 247.0  | 174.5 Sumo1         | SMT3 suppressor of mit two 3 homolog 1 (yeast) (Sumo1), mRNA.                                                |
| ILMN_3128 | 1.86 | 1.81  | 31.1   | 27.6   | 57.7   | 49.9 Popdc2         | popeye domain containing 2 (Popdc2), transcript variant 2, mRNA.                                             |
| ILMN_3140 | 1.86 | 5.15  | 31.4   | 15.9   | 58.4   | 81.8 Tbc1d2         | TBC1 domain family, member 2 (Tbc1d2), mRNA.                                                                 |
| ILMN_1255 | 1.87 | 2.97  | 18.6   | 12.5   | 34.8   | 37.1 Sgcb           | sarcoglycan, beta (dystrophin-associated glycoprotein) (Sgcb), mRNA.                                         |
| ILMN_2476 | 1.87 | 1.44  | 81.5   | 88.4   | 152.2  | 127.4 Whrn          | whirlin (Whrn), transcript variant 3, mRNA.                                                                  |
| ILMN_2717 | 1.87 | 2.02  | 20.1   | 20.6   | 37.6   | 41.5 Rgl1           | ral guanine nucleotide dissociation stimulator, like 1 (Rgl1), mRNA. XM_924428                               |
| ILMN_3167 | 1.87 | 1.68  | 33.2   | 21.9   | 62.1   | 36.8 1190002N15Rik  | RIKEN cDNA 1190002N15 gene (1190002N15Rik), mRNA.                                                            |
| ILMN_1221 | 1.88 | 1.44  | 151.4  | 198.1  | 285.0  | 285.7 Cncd1         |                                                                                                              |
| ILMN_2720 | 1.88 | 2.22  | 61.7   | 76.1   | 116.2  | 169.4 Tctex1d2      | Tctex1 domain containing 2 (Tctex1d2), mRNA.                                                                 |
| ILMN_2690 | 1.89 | 2.02  | 20.9   | 28.0   | 39.4   | 56.4 Esam1          | endothelial cell-specific adhesion molecule (Esam1), mRNA.                                                   |
| ILMN_1222 | 1.89 | 1.64  | 264.1  | 497.0  | 499.6  | 813.2 Ccl4          | chemokine (C-C motif) ligand 4 (Ccl4), mRNA.                                                                 |
| ILMN_2974 | 1.89 | 2.04  | 164.1  | 129.7  | 310.6  | 264.8 Osbp13        | oxysterol binding protein-like 3 (Osbp13), mRNA.                                                             |
| ILMN_1255 | 1.90 | 2.73  | 244.0  | 132.1  | 463.3  | 361.0 Tmem176b      | transmembrane protein 176B (Tmem176b), mRNA.                                                                 |
| ILMN_1218 | 1.90 | 6.41  | 11.0   | 12.7   | 20.9   | 81.2 Ifitm6         | interferon induced transmembrane protein 6 (Ifitm6), mRNA.                                                   |
| ILMN_1254 | 1.91 | 1.54  | 110.9  | 148.5  | 211.3  | 228.4 Actl6a        | actin-like 6A (Actl6a), mRNA.                                                                                |
| ILMN_1225 | 1.91 | 1.42  | 91.1   | 97.7   | 173.7  | 138.3 Bzrap1        | benzodiazepine receptor associated protein 1 (Bzrap1), mRNA.                                                 |
| ILMN_1255 | 1.91 | 2.22  | 41.1   | 108.1  | 78.4   | 240.5 Ccl3          | chemokine (C-C motif) ligand 3 (Ccl3), mRNA.                                                                 |
| ILMN_2605 | 1.91 | 3.29  | 10.3   | 9.1    | 19.6   | 30.0 A1646023       | expressed sequence A1646023 (A1646023), mRNA.                                                                |
| ILMN_2861 | 1.91 | 1.41  | 223.7  | 248.6  | 427.8  | 351.4 Rb1           | retinoblastoma 1 (Rb1), mRNA.                                                                                |
| ILMN_1233 | 1.92 | 2.51  | 31.2   | 29.8   | 59.9   | 74.7 Mgmt           |                                                                                                              |
| ILMN_1211 | 1.92 | 1.53  | 76.2   | 71.3   | 146.4  | 109.2 Mkrn2         | makorin, ring finger protein, 2 (Mkrn2), mRNA.                                                               |
| ILMN_2643 | 1.92 | 2.50  | 25.1   | 29.5   | 48.3   | 73.6 Asns           | asparagine synthetase (Asns), mRNA.                                                                          |
| ILMN_2956 | 1.92 | 2.39  | 51.4   | 51.0   | 98.8   | 121.7 Rassf4        | Ras association (RalGDS/AF-6) domain family member 4 (Rassf4), mRNA.                                         |
| ILMN_1230 | 1.93 | 1.37  | 294.3  | 288.3  | 568.1  | 395.3 1700041B2ORik |                                                                                                              |
| ILMN_2936 | 1.94 | 1.85  | 130.1  | 136.8  | 252.8  | 253.0 Skap2         | src family associated phosphoprotein 2 (Skap2), mRNA.                                                        |
| ILMN_2516 | 1.94 | 1.81  | 36.8   | 38.1   | 71.5   | 68.9 4930563B1ORik  |                                                                                                              |
| ILMN_1244 | 1.96 | 6.09  | 35.4   | 7.9    | 69.2   | 48.1 Epb4.113       | erythrocyte protein band 4.1-like 3 (Epb4.113), mRNA.                                                        |
| ILMN_1255 | 1.96 | 2.16  | 26.2   | 27.6   | 51.2   | 59.8 Adrbk2         | adrenergic receptor kinase, beta 2 (Adrbk2), transcript variant 2, mRNA.                                     |
| ILMN_2484 | 1.96 | 1.18  | 401.7  | 464.4  | 787.0  | 548.0 C030002811Rik |                                                                                                              |
| ILMN_2674 | 1.98 | 2.15  | 17.0   | 16.1   | 33.6   | 34.6 Car5b          | carbonic anhydrase 5b, mitochondrial (Car5b), nuclear gene encoding mitochondrial protein, mRNA.             |
| ILMN_1251 | 1.98 | 1.23  | 2874.5 | 3801.2 | 5691.4 | 4670.9 Pscdbp       | pleckstrin homology, Sec7 and coiled-coil domains, binding protein (Pscdbp), mRNA.                           |
| ILMN_1243 | 1.99 | 2.24  | 17.0   | 22.2   | 34.0   | 49.7 Hist1h2bc      | histone cluster 1, H2bc (Hist1h2bc), mRNA.                                                                   |
| ILMN_2804 | 1.99 | 2.83  | 7.8    | 11.9   | 15.5   | 33.6 EG622976       | predicted gene, EG622976 (EG622976), mRNA.                                                                   |
| ILMN_1255 | 2.00 | 1.90  | 18.9   | 20.1   | 37.9   | 38.1 2310040C09Rik  | RIKEN cDNA 2310040C09 gene (2310040C09Rik), mRNA.                                                            |
| ILMN_2987 | 2.01 | 3.65  | 34.0   | 25.1   | 68.2   | 91.6 Slc15a3        | solute carrier family 15, member 3 (Slc15a3), mRNA.                                                          |
| ILMN_3160 | 2.02 | 3.96  | 10.1   | 6.8    | 20.5   | 26.8 AA467197       | expressed sequence AA467197 (AA467197), mRNA.                                                                |
| ILMN_2834 | 2.02 | 3.73  | 41.0   | 43.1   | 82.9   | 160.6 Tgfbi         | transforming growth factor, beta induced (Tgfbi), mRNA.                                                      |
| ILMN_2765 | 2.02 | 1.30  | 3706.9 | 4159.1 | 7504.3 | 5394.7 Cd6          | CD6 antigen (Cd6), transcript variant 2, mRNA.                                                               |
| ILMN_2680 | 2.03 | 4.01  | 20.1   | 10.3   | 40.6   | 41.4 Cysl1r1        | cysteinyl leukotriene receptor 1 (Cysl1r1), mRNA.                                                            |
| ILMN_2728 | 2.03 | 1.30  | 51.2   | 67.5   | 103.7  | 87.7 Sdc4           | syndecan 4 (Sdc4), mRNA.                                                                                     |
| ILMN_2611 | 2.03 | 2.19  | 51.2   | 68.2   | 104.0  | 149.7 Dek           | DEK oncogene (DNA binding) (Dek), mRNA.                                                                      |
| ILMN_1233 | 2.04 | 2.73  | 82.3   | 89.6   | 168.3  | 245.0 Ifitm2        | interferon induced transmembrane protein 2 (Ifitm2), mRNA.                                                   |
| ILMN_2760 | 2.04 | 1.51  | 53.1   | 57.4   | 108.6  | 86.9 B9d2           | B9 protein domain 2 (B9d2), mRNA.                                                                            |
| ILMN_2448 | 2.06 | 1.89  | 24.0   | 19.9   | 49.5   | 37.6 C130092E12     |                                                                                                              |
| ILMN_2511 | 2.07 | 1.00  | 431.5  | 589.4  | 891.5  | 590.0 Whsc11        | Wolf-Hirschhorn syndrome candidate 1-like 1 (human) (Whsc11), transcript variant 1, mRNA.                    |
| ILMN_1214 | 2.07 | 2.11  | 25.4   | 29.6   | 52.4   | 62.5 Ifitm1         | interferon induced transmembrane protein 1 (Ifitm1), mRNA.                                                   |
| ILMN_2598 | 2.07 | 1.56  | 64.8   | 95.3   | 134.4  | 148.3 Idh2          | isocitrate dehydrogenase 2 (NADP+), mitochondrial (Idh2), nuclear gene encoding mitochondrial protein, mRNA. |
| ILMN_3161 | 2.08 | 4.05  | 11.6   | 12.3   | 24.1   | 49.9 Clec4a4        | C-type lectin domain family 4, member a4 (Clec4a4), mRNA.                                                    |
| ILMN_2455 | 2.08 | 1.15  | 57.3   | 66.8   | 119.3  | 77.1 Gpr137b-ps     | G protein-coupled receptor 137B, pseudogene (Gpr137b-ps) on chromosome 13.                                   |
| ILMN_2711 | 2.08 | 2.59  | 55.3   | 43.0   | 115.1  | 111.3 Bik           | Bcl2-interacting killer (Bik), mRNA.                                                                         |
| ILMN_1260 | 2.10 | 1.90  | 44.1   | 32.2   | 92.5   | 61.3 Pfn2           | profilin 2 (Pfn2), mRNA.                                                                                     |
| ILMN_1255 | 2.10 | 1.38  | 78.5   | 68.0   | 165.2  | 93.6 2010106G01Rik  | RIKEN cDNA 2010106G01 gene (2010106G01Rik), mRNA.                                                            |
| ILMN_1214 | 2.11 | 1.59  | 127.8  | 129.3  | 269.1  | 205.7 Gng2          | guanine nucleotide binding protein (G protein), gamma 2 (Gng2), transcript variant 2, mRNA.                  |
| ILMN_2497 | 2.11 | 1.31  | 102.9  | 128.0  | 216.8  | 167.5 LOC630408     | PREDICTED: similar to TRAV7-1 (LOC630408), mRNA.                                                             |
| ILMN_2614 | 2.11 | 1.80  | 66.9   | 73.9   | 141.3  | 133.2 Fah           | fumarylacetoacetate hydrolase (Fah), mRNA.                                                                   |
| ILMN_2767 | 2.11 | 13.72 | 6.0    | 1.6    | 12.6   | 21.5 2210011C24Rik  | PREDICTED: RIKEN cDNA 2210011C24 gene (2210011C24Rik), mRNA.                                                 |
| ILMN_2615 | 2.11 | 24.07 | 6.0    | 1.9    | 12.6   | 46.8 Eraf           | erythroid associated factor (Eraf), mRNA.                                                                    |
| ILMN_2633 | 2.12 | 1.58  | 96.8   | 51.1   | 205.7  | 80.7 LOC100047788   | PREDICTED: similar to gamma-2a immunoglobulin heavy chain (LOC100047788), mRNA.                              |
| ILMN_2888 | 2.12 | 1.92  | 431.2  | 214.5  | 916.1  | 412.2 Ccr6          | chemokine (C-C motif) receptor 6 (Ccr6), mRNA.                                                               |
| ILMN_3160 | 2.13 | 0.95  | 722.3  | 703.6  | 1535.9 | 671.3 Dok2          | docking protein 2 (Dok2), mRNA.                                                                              |
| ILMN_1211 | 2.14 | 5.43  | 26.0   | 18.1   | 55.7   | 98.5 Emr1           | EGF-like module containing, mucin-like, hormone receptor-like sequence 1 (Emr1), mRNA.                       |
| ILMN_2588 | 2.15 | 3.62  | 64.2   | 54.5   | 137.8  | 197.3 Tmem51        | transmembrane protein 51 (Tmem51), mRNA.                                                                     |
| ILMN_2511 | 2.15 | 1.91  | 13.2   | 20.8   | 28.4   | 39.8 mt-Nd4l        |                                                                                                              |
| ILMN_2667 | 2.16 | 1.89  | 66.1   | 67.2   | 142.8  | 126.8 Dnajb13       | Dnaj (Hsp40) related, subfamily B, member 13 (Dnajb13), mRNA.                                                |
| ILMN_2790 | 2.18 | 1.19  | 159.3  | 206.2  | 347.1  | 246.1 Snn           | stannin (Snn), mRNA.                                                                                         |
| ILMN_1221 | 2.19 | 5.00  | 117.2  | 81.5   | 257.0  | 407.7 5730469M10Rik | RIKEN cDNA 5730469M10 gene (5730469M10Rik), mRNA.                                                            |
| ILMN_2611 | 2.21 | 1.63  | 66.9   | 91.7   | 148.0  | 149.8 Il1r2         | interleukin 1 receptor, type II (Il1r2), mRNA.                                                               |
| ILMN_3143 | 2.24 | 1.80  | 43.4   | 34.3   | 97.0   | 61.9 A1449175       | expressed sequence A1449175 (A1449175), transcript variant 1, mRNA.                                          |
| ILMN_2647 | 2.25 | 2.08  | 48.7   | 60.4   | 109.6  | 125.6 Nav1          | neuron navigator 1 (Nav1), mRNA.                                                                             |
| ILMN_2907 | 2.26 | 1.42  | 345.6  | 492.7  | 780.1  | 699.3 Gadd45g       | growth arrest and DNA-damage-inducible 45 gamma (Gadd45g), mRNA.                                             |
| ILMN_2718 | 2.26 | 3.26  | 35.0   | 24.9   | 79.1   | 81.0 Rab26          | PREDICTED: RAB26, member RAS oncogene family, transcript variant 1 (Rab26), mRNA.                            |
| ILMN_1238 | 2.26 | 5.31  | 22.2   | 12.5   | 50.1   | 66.2 Ikg-V38        |                                                                                                              |
| ILMN_2551 | 2.26 | 1.04  | 99.6   | 114.7  | 225.3  | 119.4 C330049H01Rik |                                                                                                              |
| ILMN_1245 | 2.27 | 1.22  | 390.9  | 456.2  | 888.3  | 558.3 Bhlhb2        | basic helix-loop-helix domain containing, class B2 (Bhlhb2), mRNA.                                           |
| ILMN_2801 | 2.28 | 16.91 | 14.4   | 10.3   | 32.8   | 174.8 Cygb          | cytoglobin (Cygb), mRNA.                                                                                     |
| ILMN_2705 | 2.30 | 0.99  | 101.8  | 131.0  | 233.9  | 130.2 Deadc1        | deaminase domain containing 1 (Deadc1), mRNA.                                                                |
| ILMN_2814 | 2.30 | 5.72  | 6.1    | 4.7    | 13.9   | 27.0 Ear12          | eosinophil-associated, ribonuclease A family, member 12 (Ear12), mRNA.                                       |
| ILMN_1245 | 2.30 | 12.83 | 1.7    | 2.4    | 4.0    | 30.3 Hspa1a         | heat shock protein 1A (Hspa1a), mRNA.                                                                        |
| ILMN_2647 | 2.30 | 1.83  | 45.5   | 44.1   | 104.8  | 80.6 Ppp1cb         |                                                                                                              |
| ILMN_2631 | 2.31 | 14.89 | 36.7   | 15.1   | 84.7   | 224.4 Fcgr4         | Fc receptor, IgG, low affinity IV (Fcgr4), mRNA.                                                             |
| ILMN_2743 | 2.31 | 0.98  | 210.3  | 253.4  | 485.8  | 249.3 Matk          | megakaryocyte-associated tyrosine kinase (Matk), mRNA.                                                       |
| ILMN_1233 | 2.32 | 2.29  | 11.5   | 15.0   | 26.7   | 34.2 LOC677008      | PREDICTED: similar to 28A, transcript variant 2 (LOC677008), mRNA.                                           |
| ILMN_2798 | 2.32 | 2.47  | 14.1   | 7.4    | 32.7   | 18.4 Speer3         | spermatogenesis associated glutamate (E)-rich protein 3 (Speer3), mRNA.                                      |
| ILMN_2667 | 2.33 | 2.53  | 32.7   | 43.2   | 76.1   | 109.2 Dnase113      |                                                                                                              |
| ILMN_2870 | 2.33 | 7.16  | 14.4   | 11.5   | 33.7   | 82.2 Hfe            | hemochromatosis (Hfe), mRNA.                                                                                 |
| ILMN_1248 | 2.35 | 5.60  | 35.8   | 18.4   | 84.0   | 103.2 1500009L16Rik | PREDICTED: RIKEN cDNA 1500009L16 gene (1500009L16Rik), mRNA.                                                 |
| ILMN_2777 | 2.35 | 2.85  | 42.1   | 113.5  | 98.8   | 323.4 Il1b          |                                                                                                              |
| ILMN_1230 | 2.36 | 3.71  | 44.3   | 59.5   | 104.6  | 221.0 Adam23        | a disintegrin and metallopeptidase domain 23 (Adam23), mRNA.                                                 |
| ILMN_2797 | 2.38 | 2.59  | 40.9   | 50.7   | 97.5   | 131.4 Ube2e2        | ubiquitin-conjugating enzyme E2E 2 (UBC4/5 homolog, yeast) (Ube2e2), mRNA.                                   |
| ILMN_2764 | 2.40 | 1.84  | 161.2  | 189.3  | 387.3  | 349.0 Actn2         |                                                                                                              |
| ILMN_1245 | 2.40 | 1.15  | 41.6   | 28.7   | 100.0  | 33.0 Ighg           | PREDICTED: Immunoglobulin heavy chain (gamma polypeptide), transcript variant 1 (Ighg), mRNA.                |
| ILMN_2993 | 2.42 | 4.61  | 15.9   | 9.9    | 38.3   | 45.8 Clec4n         | C-type lectin domain family 4, member n (Clec4n), mRNA.                                                      |
| ILMN_1240 | 2.42 | 2.74  | 31.0   | 23.6   | 74.9   | 64.7 Mmp14          | matrix metalloproteinase 14 (membrane-inserted) (Mmp14), mRNA.                                               |
| ILMN_2764 | 2.43 | 1.87  | 34.1   | 40.0   | 82.9   | 74.5 Igfbp7         | insulin-like growth factor binding protein 7 (Igfbp7), mRNA.                                                 |
| ILMN_1247 | 2.44 | 13.80 | 9.7    | 2.8    | 23.6   | 38.0 Fpr2           | formyl peptide receptor 2 (Fpr2), mRNA.                                                                      |
| ILMN_2868 | 2.44 | 7.18  | 14.2   | 12.0   | 34.7   | 86.1 Ear4           | eosinophil-associated, ribonuclease A family, member 4 (Ear4), mRNA.                                         |
| ILMN_3154 | 2.45 | 4.03  | 48.7   | 48.8   | 119.3  | 196.5 Sirpb1        | signal-regulatory protein beta 1 (Sirpb1), transcript variant 3, mRNA.                                       |
| ILMN_2618 | 2.51 | 1.01  | 384.8  | 749.3  | 964.7  | 759.9 Socs3         | suppressor of cytokine signaling 3 (Socs3), mRNA.                                                            |
| ILMN_1251 | 2.51 | 1.41  | 17.7   | 29.7   | 44.4   | 41.9 Aff4           | AF4/FMR2 family, member 4 (Aff4), mRNA.                                                                      |

|           |       |       |       |       |        |                     |                                                                                                                    |
|-----------|-------|-------|-------|-------|--------|---------------------|--------------------------------------------------------------------------------------------------------------------|
| ILMN_277f | 2.52  | 1.93  | 19.3  | 21.7  | 48.6   | 41.8 Ttbk1          | PREDICTED: tau tubulin kinase 1 (Ttbk1), mRNA.                                                                     |
| ILMN_300d | 2.53  | 2.49  | 9.3   | 9.1   | 23.5   | 22.7 D930028F11Rik  | RIKEN cDNA D930028F11 gene (D930028F11Rik), mRNA.                                                                  |
| ILMN_274f | 2.53  | 3.43  | 5.9   | 6.9   | 14.9   | 23.7 Cd14           | CD14 antigen (Cd14), mRNA.                                                                                         |
| ILMN_251f | 2.54  | 1.73  | 15.4  | 15.3  | 39.1   | 26.5 4733401H18Rik  |                                                                                                                    |
| ILMN_292f | 2.55  | 3.43  | 6.0   | 6.8   | 15.2   | 23.4 Il13           | interleukin 13 (Il13), mRNA.                                                                                       |
| ILMN_269f | 2.57  | 1.20  | 47.3  | 93.2  | 121.3  | 111.8 2810410P22Rik |                                                                                                                    |
| ILMN_269f | 2.58  | 3.78  | 90.2  | 86.1  | 232.5  | 325.5 Tgm2          | transglutaminase 2, C polypeptide (Tgm2), mRNA.                                                                    |
| ILMN_125f | 2.58  | 0.92  | 55.4  | 67.4  | 143.1  | 62.2 LOC100045878   | PREDICTED: similar to TRAV6D-4 (LOC100045878), mRNA.                                                               |
| ILMN_287f | 2.61  | 4.60  | 6.4   | 4.5   | 16.8   | 20.7 BC057371       | cDNA sequence BC057371 (BC057371), mRNA.                                                                           |
| ILMN_275f | 2.61  | 3.71  | 8.9   | 11.2  | 23.2   | 41.5 Il1r1          | interleukin 1 receptor-like 1 (Il1r1), transcript variant 2, mRNA.                                                 |
| ILMN_316f | 2.64  | 1.38  | 17.0  | 21.7  | 44.8   | 30.1 Tube1          | epsilon-tubulin 1 (Tube1), mRNA.                                                                                   |
| ILMN_122f | 2.66  | 1.82  | 7.6   | 8.5   | 20.3   | 15.6 Il17a          | interleukin 17A (Il17a), mRNA.                                                                                     |
| ILMN_252f | 2.67  | 4.38  | 6.7   | 6.7   | 17.8   | 29.4 LOC328660      |                                                                                                                    |
| ILMN_252d | 2.69  | 6.03  | 46.5  | 28.4  | 124.9  | 171.5 Ear3          | eosinophil-associated, ribonuclease A family, member 3 (Ear3), mRNA.                                               |
| ILMN_123f | 2.76  | 2.14  | 41.7  | 99.2  | 115.0  | 212.7 Areg          | amphiregulin (Areg), mRNA.                                                                                         |
| ILMN_278f | 2.76  | 3.17  | 12.5  | 7.7   | 34.5   | 24.4 Il17rc         | interleukin 17 receptor C (Il17rc), mRNA.                                                                          |
| ILMN_246f | 2.78  | 2.16  | 30.2  | 35.4  | 83.9   | 76.5 Slc16a5        | solute carrier family 16 (monocarboxylic acid transporters), member 5 (Slc16a5), mRNA.                             |
| ILMN_283f | 2.80  | 5.02  | 13.8  | 11.9  | 38.7   | 59.6 LOC100041004   | PREDICTED: similar to p52m (LOC100041004), mRNA.                                                                   |
| ILMN_263d | 2.84  | 3.09  | 30.9  | 19.2  | 87.8   | 59.3 Il17re         | interleukin 17 receptor E (Il17re), transcript variant 1, mRNA.                                                    |
| ILMN_261f | 2.85  | 3.07  | 5.0   | 8.4   | 14.2   | 25.8 Zbtb46         | zinc finger and BTB domain containing 46 (Zbtb46), mRNA.                                                           |
| ILMN_122f | 2.88  | 3.45  | 434.3 | 232.9 | 1252.8 | 802.6 Lgals3        | lectin, galactose binding, soluble 3 (Lgals3), mRNA.                                                               |
| ILMN_125f | 2.91  | 1.91  | 14.2  | 17.6  | 41.3   | 33.5 Scin           | scinderin (Scin), mRNA.                                                                                            |
| ILMN_276f | 2.93  | 6.78  | 5.5   | 3.8   | 16.2   | 25.7 Msc            | musculin (Msc), mRNA.                                                                                              |
| ILMN_125f | 2.94  | 2.10  | 12.1  | 16.0  | 35.5   | 33.6 Tshz3          | teashirt zinc finger family member 3 (Tshz3), mRNA.                                                                |
| ILMN_123f | 3.07  | 31.98 | 4.5   | 1.3   | 13.8   | 41.9 LOC100048554   | PREDICTED: similar to monocyte chemoattractant protein-2 (MCP-2) (LOC100048554), mRNA.                             |
| ILMN_123f | 3.10  | 2.52  | 35.0  | 59.8  | 108.6  | 150.7 Spint1        | serine protease inhibitor, Kunitz type 1 (Spint1), mRNA.                                                           |
| ILMN_276f | 3.13  | 1.98  | 23.7  | 21.8  | 74.3   | 43.2 Rorc           | RAR-related orphan receptor gamma (Rorc), mRNA.                                                                    |
| ILMN_121f | 3.19  | 3.67  | 37.2  | 55.4  | 118.7  | 203.2 Ier3          | immediate early response 3 (Ier3), mRNA.                                                                           |
| ILMN_275f | 3.20  | 2.31  | 8.6   | 11.2  | 27.5   | 25.9 She            | src homology 2 domain-containing transforming protein E (She), mRNA.                                               |
| ILMN_267f | 3.21  | 0.81  | 40.5  | 56.0  | 129.8  | 45.6 LOC100047606   | PREDICTED: similar to neurotrophic tyrosine kinase, receptor, type 3 (LOC100047606), misc RNA.                     |
| ILMN_253f | 3.25  | 1.51  | 18.4  | 31.0  | 59.9   | 46.9 LOC386505      |                                                                                                                    |
| ILMN_269f | 3.27  | 1.42  | 25.2  | 57.2  | 82.4   | 81.4 2810410P22Rik  |                                                                                                                    |
| ILMN_255f | 3.28  | 1.63  | 127.0 | 160.7 | 416.9  | 261.3 E430033807Rik |                                                                                                                    |
| ILMN_124f | 3.31  | 2.36  | 45.4  | 43.9  | 150.3  | 103.7 Gp49a         |                                                                                                                    |
| ILMN_301f | 3.33  | 2.45  | 12.0  | 7.2   | 39.8   | 17.6 Fut10          | fucosyltransferase 10 (Fut10), transcript variant A, mRNA.                                                         |
| ILMN_273f | 3.34  | 7.29  | 45.5  | 36.7  | 151.9  | 267.5 Ear2          | eosinophil-associated, ribonuclease A family, member 2 (Ear2), mRNA.                                               |
| ILMN_122f | 3.35  | 10.85 | 48.4  | 22.4  | 162.4  | 242.5 Lt4r1         | leukotriene B4 receptor 1 (Lt4r1), mRNA.                                                                           |
| ILMN_269f | 3.42  | 2.75  | 196.0 | 193.2 | 669.7  | 531.6 Nrn1          | neurtin 1 (Nrn1), mRNA.                                                                                            |
| ILMN_247f | 3.43  | 2.74  | 76.5  | 97.8  | 262.8  | 268.4 1200016E24Rik |                                                                                                                    |
| ILMN_122f | 3.45  | 1.24  | 38.5  | 91.7  | 133.0  | 113.6 Arl5a         | ADP-ribosylation factor-like 5A (Arl5a), mRNA.                                                                     |
| ILMN_124f | 3.52  | 1.66  | 10.3  | 18.6  | 36.3   | 31.0 Daam1          | dishevelled associated activator of morphogenesis 1 (Daam1), transcript variant 2, mRNA.                           |
| ILMN_275f | 3.53  | 1.12  | 21.7  | 33.7  | 76.7   | 37.7 Mtmr9          | myotubularin related protein 9 (Mtmr9), mRNA.                                                                      |
| ILMN_292f | 3.54  | 6.38  | 77.6  | 67.9  | 275.1  | 433.0 Ear2          | eosinophil-associated, ribonuclease A family, member 2 (Ear2), mRNA.                                               |
| ILMN_122f | 3.59  | 3.17  | 5.1   | 9.0   | 18.2   | 28.6 Hspa1a         |                                                                                                                    |
| ILMN_266f | 3.62  | 3.03  | 5.6   | 5.9   | 20.3   | 17.9 Itgb5          | integrin beta 5 (Itgb5), mRNA.                                                                                     |
| ILMN_243f | 3.64  | 5.49  | 4.4   | 4.3   | 15.9   | 23.8 Lats1          |                                                                                                                    |
| ILMN_261f | 3.70  | 1.74  | 52.7  | 83.1  | 194.9  | 144.8 C330008K14Rik |                                                                                                                    |
| ILMN_125f | 4.14  | 4.42  | 21.3  | 17.7  | 88.2   | 78.2 2900016B01Rik  | PREDICTED: RIKEN cDNA 2900016B01 gene (2900016B01Rik), mRNA.                                                       |
| ILMN_277f | 4.37  | 1.58  | 31.6  | 29.1  | 138.0  | 45.9 Gal            | galanin (Gal), mRNA.                                                                                               |
| ILMN_314f | 4.85  | 2.79  | 5.2   | 5.1   | 25.4   | 14.2 Mtus1          | mitochondrial tumor suppressor 1 (Mtus1), nuclear gene encoding mitochondrial protein, transcript variant 3, mRNA. |
| ILMN_260f | 4.87  | 5.69  | 82.6  | 92.7  | 402.1  | 526.9 Pdlim4        | PDZ and LIM domain 4 (Pdlim4), mRNA.                                                                               |
| ILMN_122f | 4.88  | 1.68  | 11.1  | 13.1  | 54.2   | 22.0 A230057G18Rik  |                                                                                                                    |
| ILMN_248f | 5.11  | 1.94  | 15.3  | 16.4  | 78.3   | 31.8 LOC668047      | PREDICTED: similar to ring finger protein 170 (LOC668047), mRNA.                                                   |
| ILMN_122f | 5.20  | 2.36  | 33.0  | 26.6  | 171.9  | 62.7 Cpe            |                                                                                                                    |
| ILMN_122f | 5.56  | 3.58  | 2.8   | 3.9   | 15.8   | 14.1 Slc22a4        | solute carrier family 22 (organic cation transporter), member 4 (Slc22a4), mRNA.                                   |
| ILMN_122f | 6.13  | 14.53 | 10.1  | 7.2   | 61.7   | 103.9 Pparg         | peroxisome proliferator activated receptor gamma (Pparg), mRNA.                                                    |
| ILMN_264f | 6.24  | 0.52  | 47.8  | 136.7 | 298.1  | 70.8 Sostdc1        | sclerostin domain containing 1 (Sostdc1), mRNA.                                                                    |
| ILMN_245f | 6.39  | 2.18  | 6.4   | 9.9   | 41.0   | 21.6 5930412G12Rik  |                                                                                                                    |
| ILMN_125d | 6.59  | 9.16  | 9.7   | 7.6   | 63.7   | 70.0 Igg-V38        |                                                                                                                    |
| ILMN_246f | 6.62  | 2.27  | 7.8   | 7.2   | 51.3   | 16.3 LOC640340      | PREDICTED: similar to Ig kappa chain V-IV region B17 precursor (LOC640340), mRNA.                                  |
| ILMN_315f | 6.96  | 2.12  | 8.3   | 16.1  | 57.6   | 34.2 Pdzrn3         | PDZ domain containing RING finger 3 (Pdzrn3), mRNA.                                                                |
| ILMN_262f | 7.42  | 3.46  | 23.6  | 20.1  | 174.8  | 69.5 E430002D04Rik  |                                                                                                                    |
| ILMN_270d | 9.83  | 13.05 | 4.5   | 3.0   | 44.0   | 38.6 Siat7a         |                                                                                                                    |
| ILMN_256d | 10.27 | 1.87  | 2.0   | 7.2   | 20.1   | 13.5 9630038C08Rik  |                                                                                                                    |
| ILMN_124f | 10.87 | 6.97  | 3.6   | 3.9   | 39.7   | 27.3 BC018473       | cDNA sequence BC018473 (BC018473) on chromosome 11.                                                                |
| ILMN_292f | 16.64 | 1.17  | 2.1   | 11.0  | 35.4   | 12.9 Mxra8          | matrix-remodelling associated 8 (Mxra8), mRNA.                                                                     |
| ILMN_122d | 19.53 | 12.06 | 2.7   | 2.8   | 52.1   | 33.5 Jarid1d        | jumonji, AT rich interactive domain 1D (Rbp2 like) (Jarid1d), mRNA.                                                |
